# Supplementary material for: Plasma fatty acids and attention deficit hyperactivity disorder: a Mendelian randomization investigation
Source: PubMed Central journal article supplement (PMC11099612; doi:10.3389/fpsyt.2024.1368942), 2024-05-03
Supplement: DataSheet_1.pdf [file DataSheet_1.pdf]

## *Supplementary Material*

# **Plasma fatty acids and attention deficit hyperactivity disorder: a Mendelian randomization investigation**

**Kangning Zhou\*, Qiang Zhang, Zhenhua Yuan, Yurou Yan, Qiang He, Junhong Wang**

\* Correspondence: [drjhwang@bucm.edu.cn](mailto:drjhwang@bucm.edu.cn)

## Content

|     |                                                                 |    |
|-----|-----------------------------------------------------------------|----|
| 1   | Supplementary Figures and Tables .....                          | 1  |
| 1.1 | Supplementary Figures .....                                     | 1  |
|     | Figure S1. Leave-one-out graph for SFAs and MUFAs on ADHD.....  | 2  |
|     | Figure S2. Leave-one-out graph for n-3 PUFAs on ADHD. ....      | 3  |
|     | Figure S3. Leave-one-out graph for n-6 PUFAs on ADHD. ....      | 5  |
|     | Figure S4. Forest plot for SFAs and MUFAs on ADHD.....          | 7  |
|     | Figure S5. Forest plot for n-3 PUFAs on ADHD.....               | 8  |
|     | Figure S6. Forest plot for n-6 PUFAs on ADHD.....               | 9  |
|     | Figure S7. Funnel plot for SFAs and MUFAs on ADHD.....          | 11 |
|     | Figure S8. Funnel plot for n-3 PUFAs on ADHD.....               | 12 |
|     | Figure S9. Funnel plot for n-6 PUFAs on ADHD.....               | 13 |
|     | Figure S10. Leave-one-out graph for ADHD on SFAs and MUFAs..... | 15 |
|     | Figure S11. Leave-one-out graph for ADHD on n-3 PUFAs. ....     | 17 |
|     | Figure S12. Leave-one-out graph for ADHD on n-6 PUFAs. ....     | 19 |
|     | Figure S13. Forest plot for ADHD on SFAs and MUFAs.....         | 21 |
|     | Figure S14. Forest plot for ADHD on n-3 PUFAs.....              | 23 |
|     | Figure S15. Forest plot for ADHD on n-6 PUFAs.....              | 24 |
|     | Figure S16. Funnel plot for ADHD on SFAs and MUFAs.....         | 26 |
|     | Figure S17. Funnel plot for ADHD on n-3 PUFAs.....              | 28 |
|     | Figure S18. Funnel plot for ADHD on n-6 PUFAs.....              | 30 |
|     | Figure S19. Scatter plots for ADHD on SFA and MUFA. ....        | 32 |
|     | Figure S20. Scatter plots for ADHD on n-3PUFA. ....             | 34 |

|                                                                                                            |    |
|------------------------------------------------------------------------------------------------------------|----|
| Figure S21. Scatter plots for ADHD on n-6PUFA. ....                                                        | 35 |
| 1.2 Supplementary Tables .....                                                                             | 36 |
| Table S1. 4 valid IVs used for MR analysis of SFA 16:0 on ADHD .....                                       | 36 |
| Table S2. 4 valid IVs used for MR analysis of SFA 18:0 on ADHD .....                                       | 36 |
| Table S3. 5 valid IVs used for MR analysis of MUFA 16:1n7 on ADHD .....                                    | 37 |
| Table S4. 3 valid IVs used for MR analysis of MUFA 18:1n9 on ADHD .....                                    | 37 |
| Table S5. 2 valid IVs used for MR analysis of n-3 ALA on ADHD .....                                        | 37 |
| Table S6. 1 valid IVs used for MR analysis of n-3 EPA on ADHD .....                                        | 38 |
| Table S7. 5 valid IVs used for MR analysis of n-3 DPA on ADHD .....                                        | 38 |
| Table S8. 5 valid IVs used for MR analysis of n-6 Adrenic A on ADHD.....                                   | 39 |
| Table S9. 12 valid IVs used for MR analysis of n-6 DGLA on ADHD .....                                      | 40 |
| Table S10. 48 valid IVs used for MR analysis of n-6 GLA on ADHD .....                                      | 41 |
| Table S11. 13 valid IVs used for MR analysis of ADHD on SFA, MUFA, n-3 DPA, n-3 .EPA, n-6DGLA, n-6GLA..... | 44 |
| Table S12. 12 valid IVs used for MR analysis of ADHD on n-3ALA .....                                       | 45 |
| Table S13. 11 valid IVs used for MR analysis of ADHD on n-6 Adrenic acid.....                              | 46 |

# 1 Supplementary Figures and Tables

## 1.1 Supplementary Figures

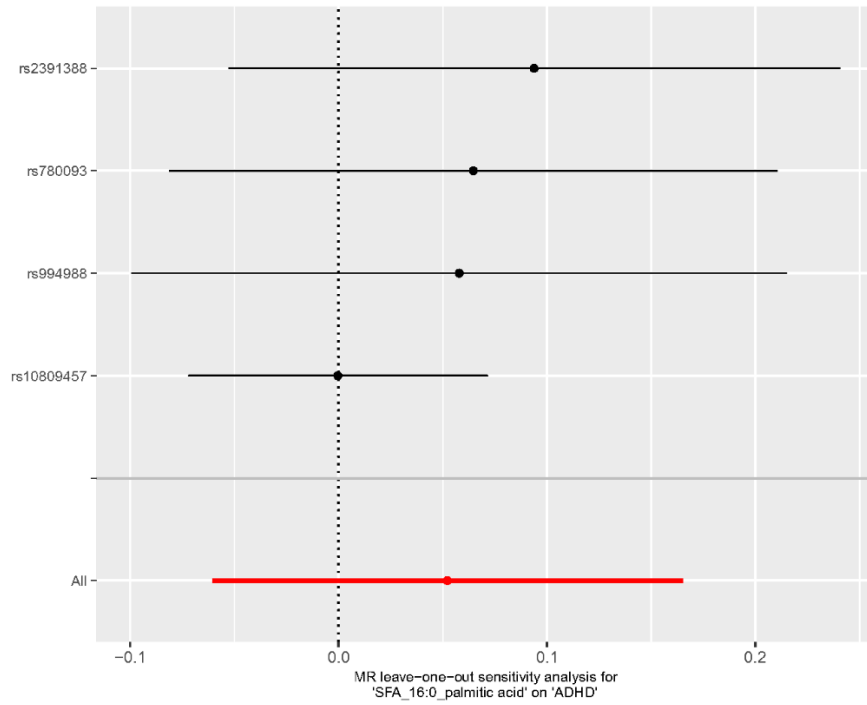

Figure S1a.

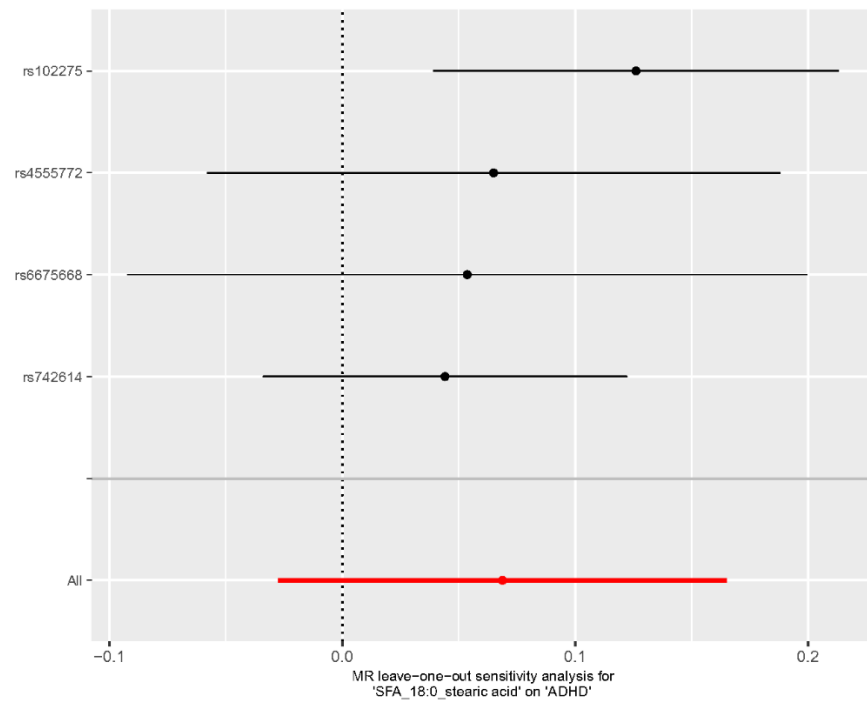

Figure S2b.

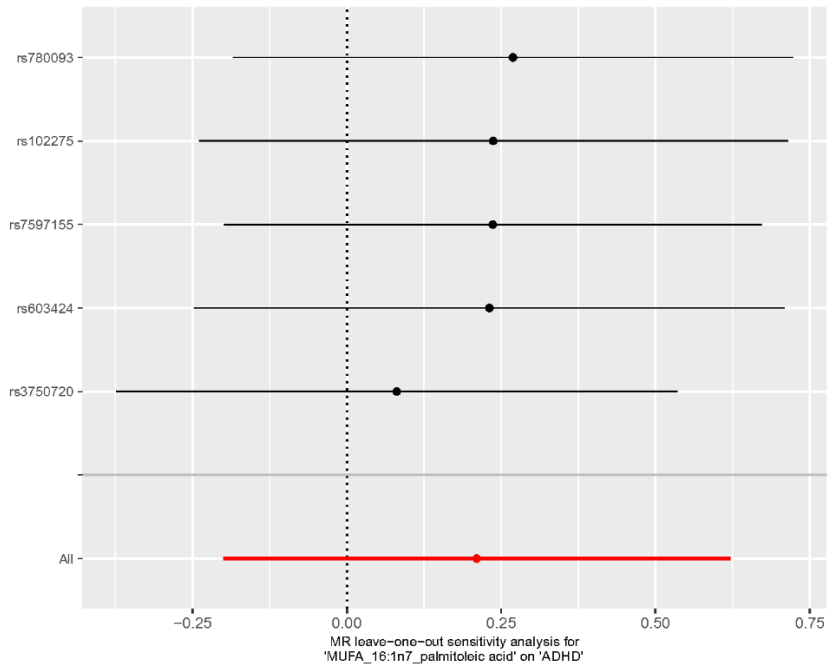

**Figure S3c.**

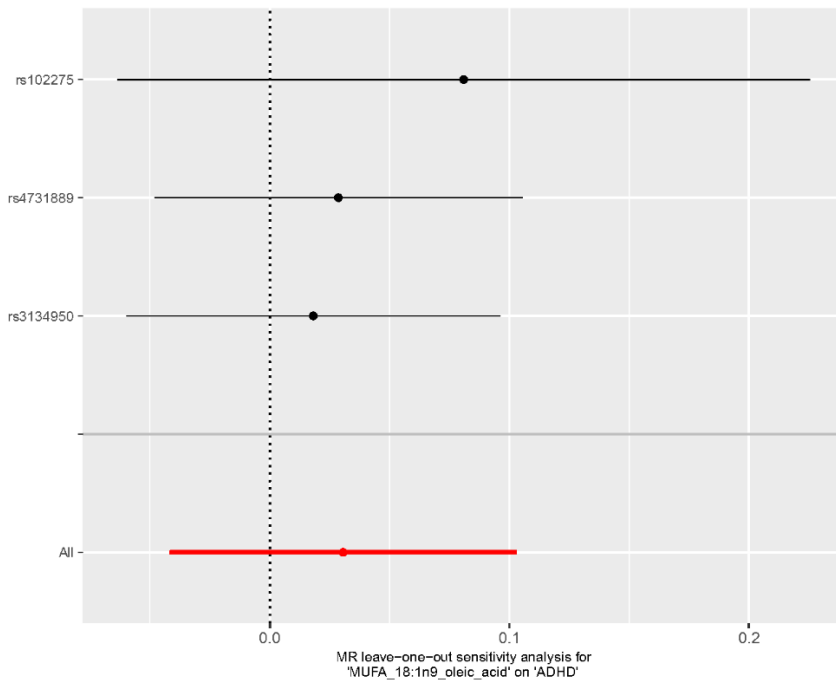

**Figure S4d.**

**Figure S1.** Leave-one-out graph for SFAs and MUFAs on ADHD.

(A) Leave-one-out graph for SFA 16:0 on ADHD. (B) Leave-one-out graph for SFA 18:0 on ADHD. (C) Leave-one-out graph for MUFA 16:1n7 on ADHD (D) Leave-one-out graph for MUFA 18:1n9 on ADHD.

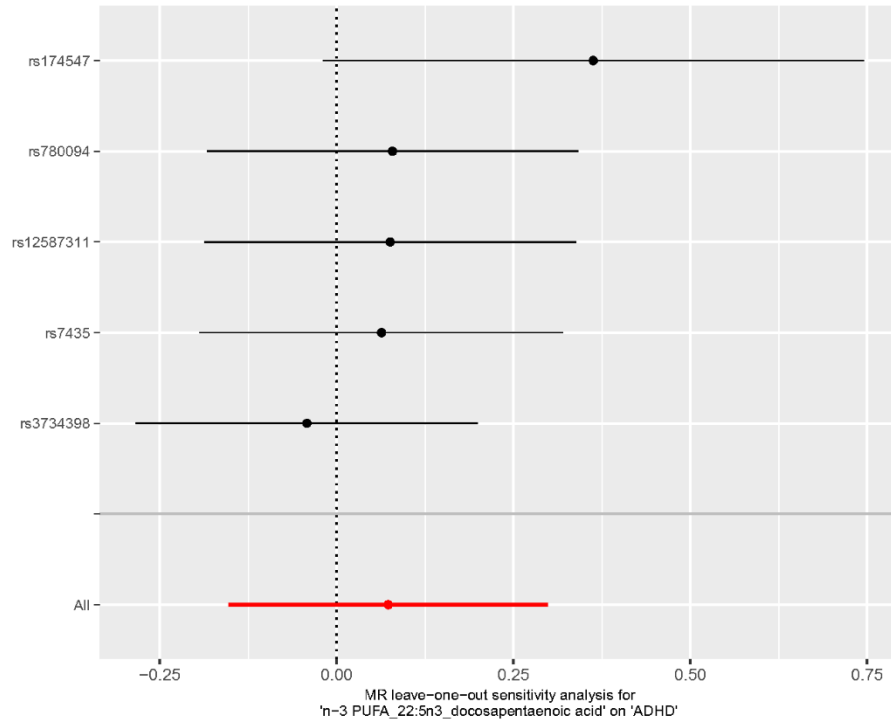

**Figure S2a.**

**Figure S2.** Leave-one-out graph for n-3 PUFAs on ADHD.

(A) Leave-one-out graph for n-3 DPA on ADHD.

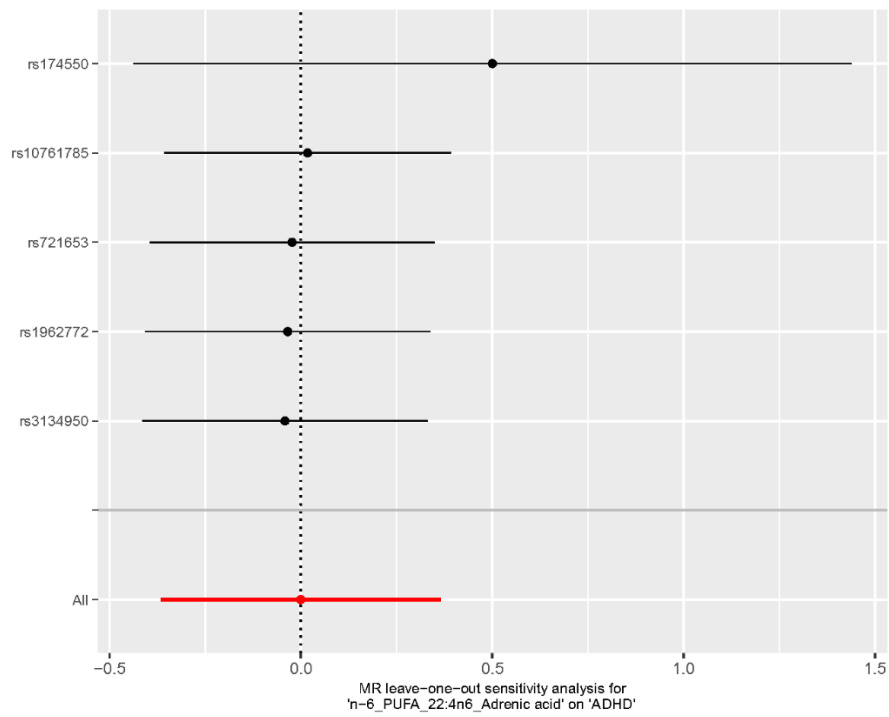

**Figure S3a.**



**Figure S3.** Leave-one-out graph for n-6 PUFAs on ADHD.

(A) Leave-one-out graph for n-6 Adrenic A on ADHD. (B) Leave-one-out graph for n-6 DGLA on ADHD. (C) Leave-one-out graph for n-6 GLA on ADHD.

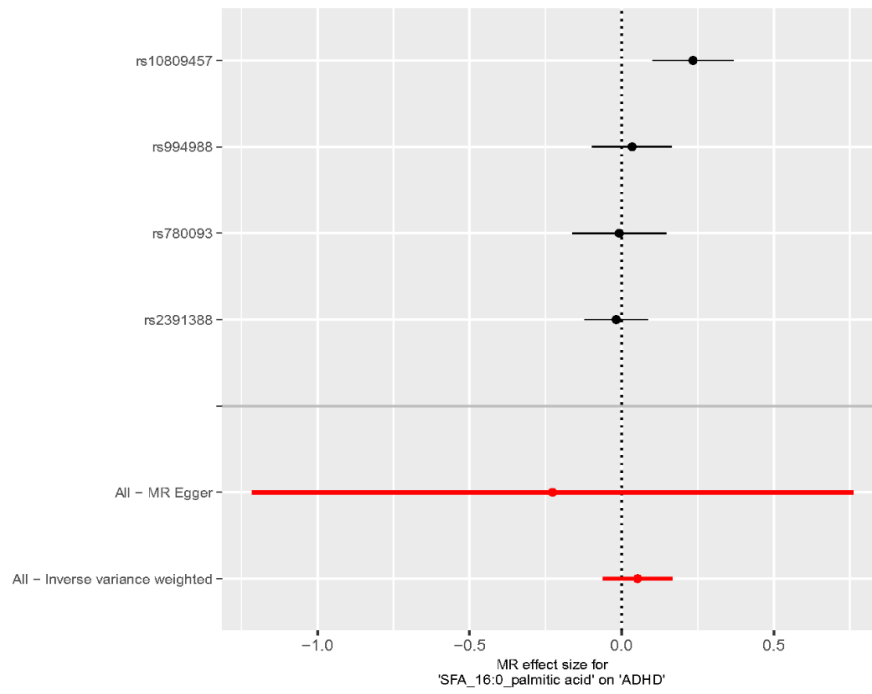

**Figure S4a.**

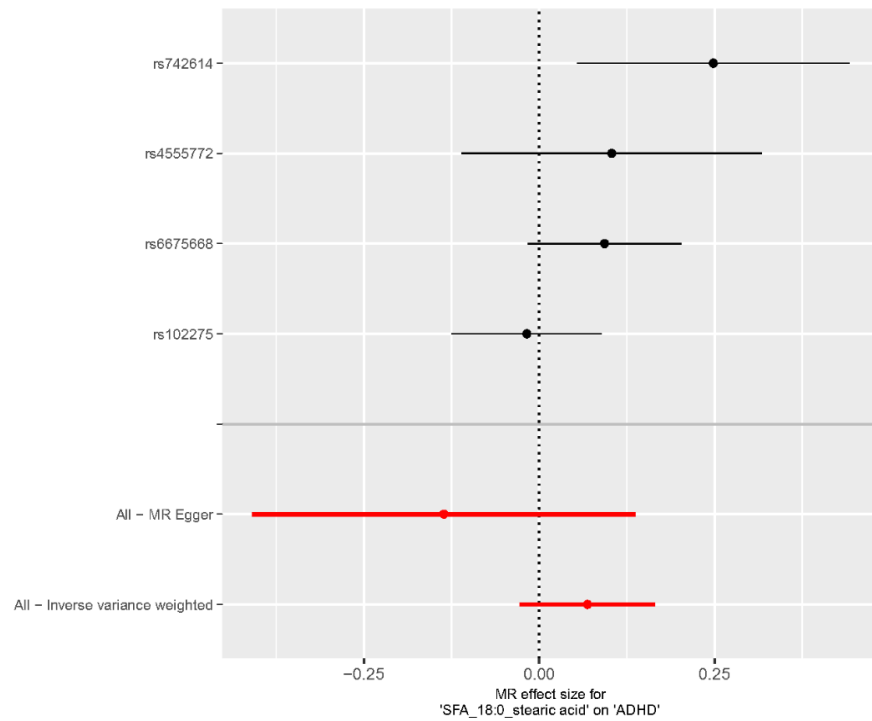

**Figure S4b.**

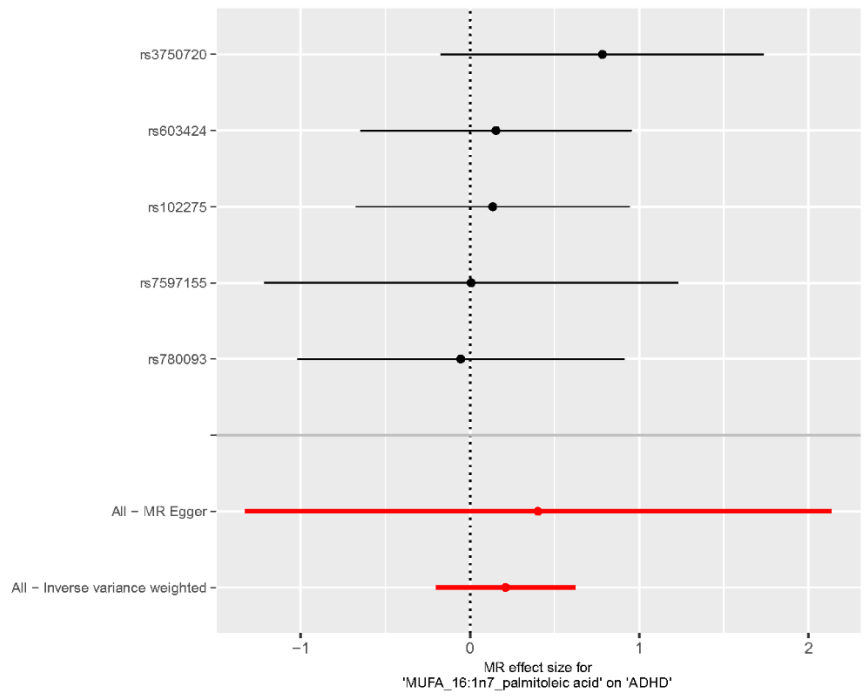

**Figure S4c.**

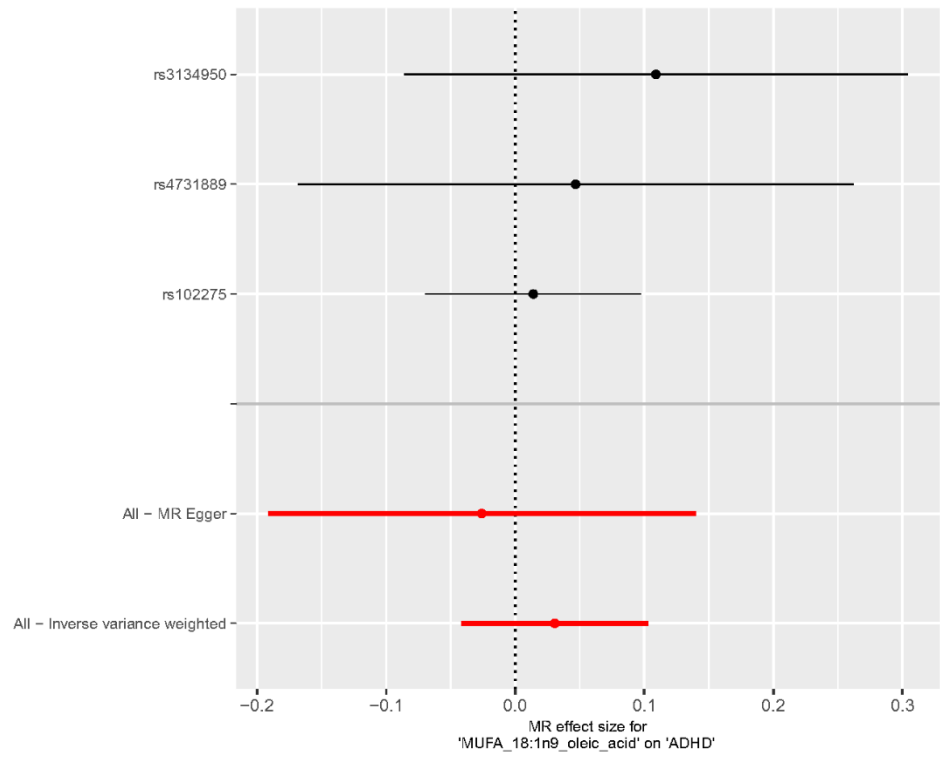

**Figure S4d.**



**Figure S4.** Forest plot for SFAs and MUFAs on ADHD.

(A) Forest plot for SFA 16:0 on ADHD. (B) Forest plot for SFA 16:1n7 on ADHD. (C) Forest plot for MUFA 18:0 on ADHD (D) Forest plot for MUFA 18:1n9 on ADHD.

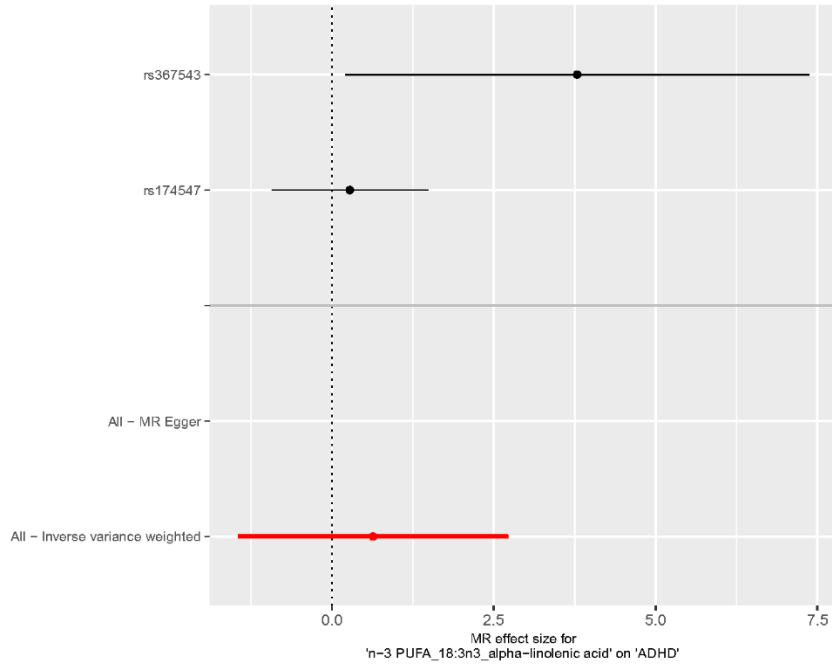

**Figure S5a.**

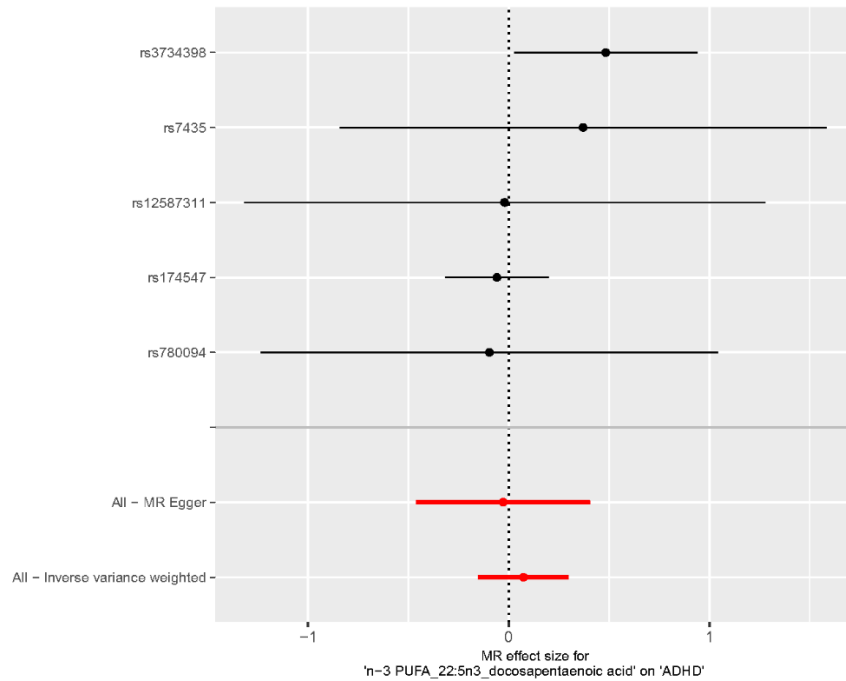

**Figure S5b.**

**Figure S5.** Forest plot for n-3 PUFAs on ADHD.

(A) Forest plot for ALA on ADHD. (B) Forest plot for DPA on ADHD.

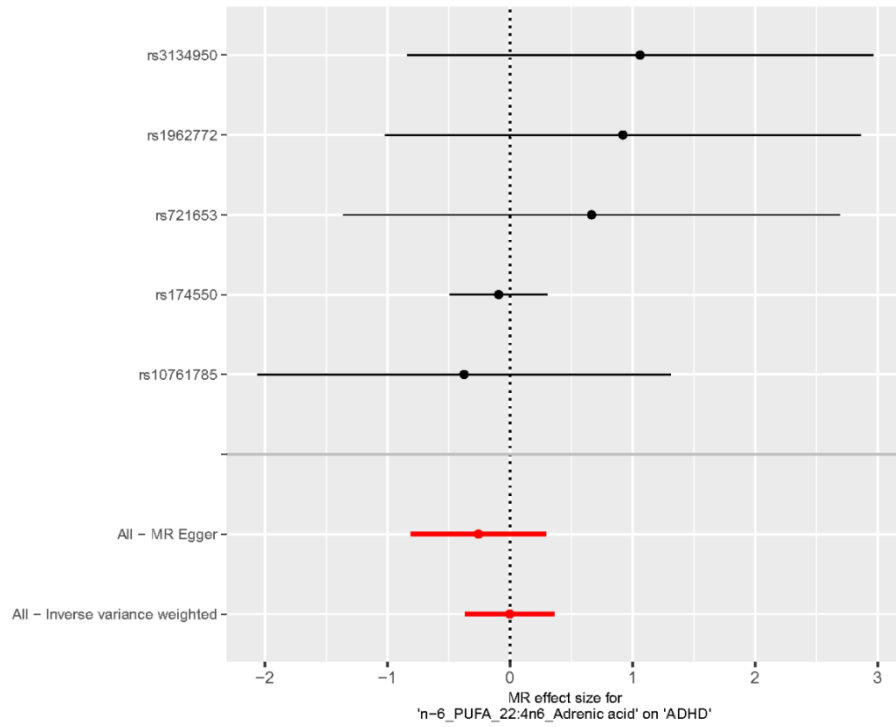

**Figure S6a.**

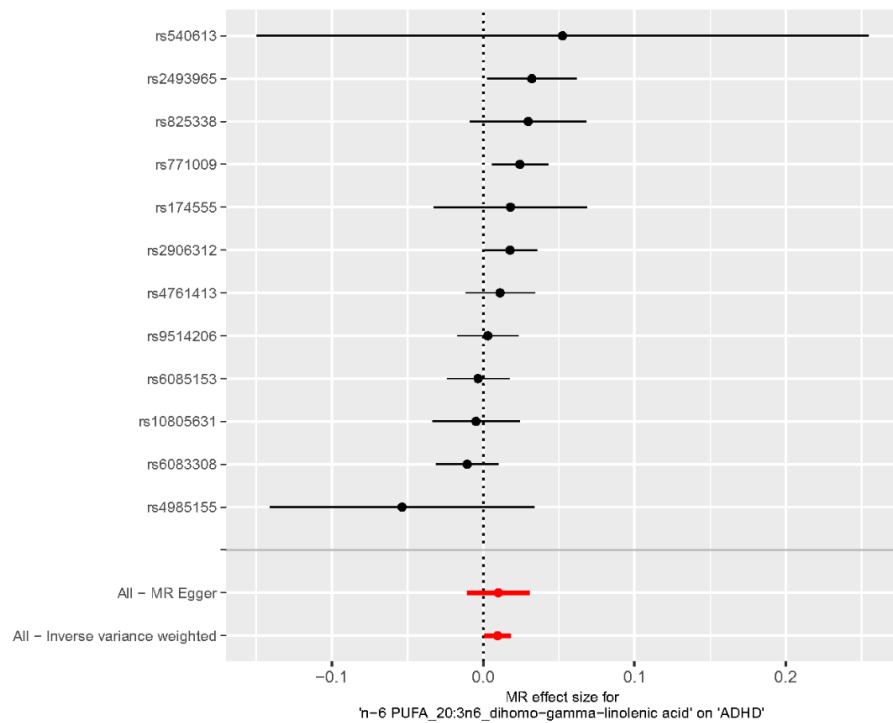

**Figure S6b.**

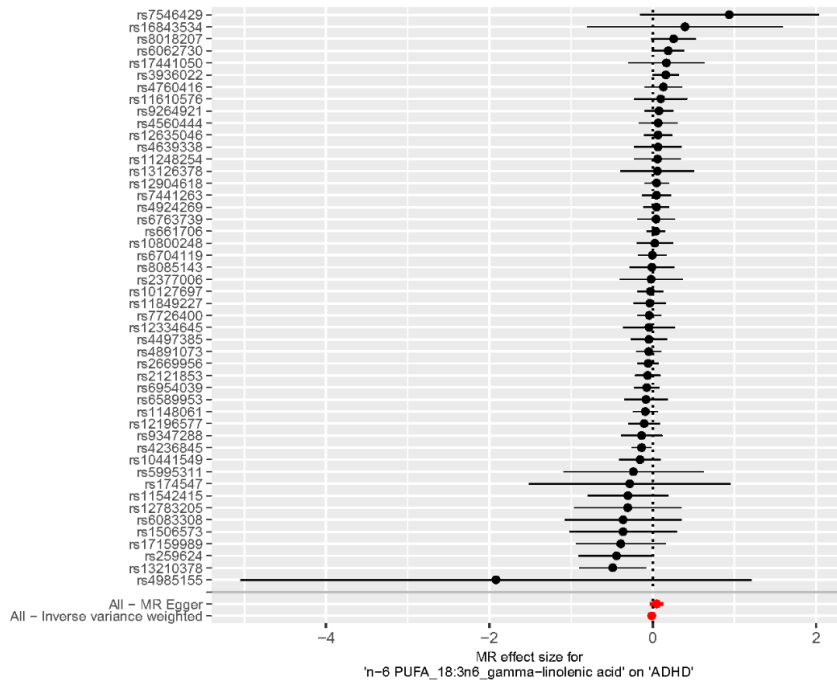

**Figure S6c.**

**Figure S6.** Forest plot for n-6 PUFAs on ADHD.

(A) Forest plot for n-6 Adrenic A on ADHD. (B) Forest plot for n-6 DGLA on ADHD. (C) Forest plot for n-6 GLA on ADHD.

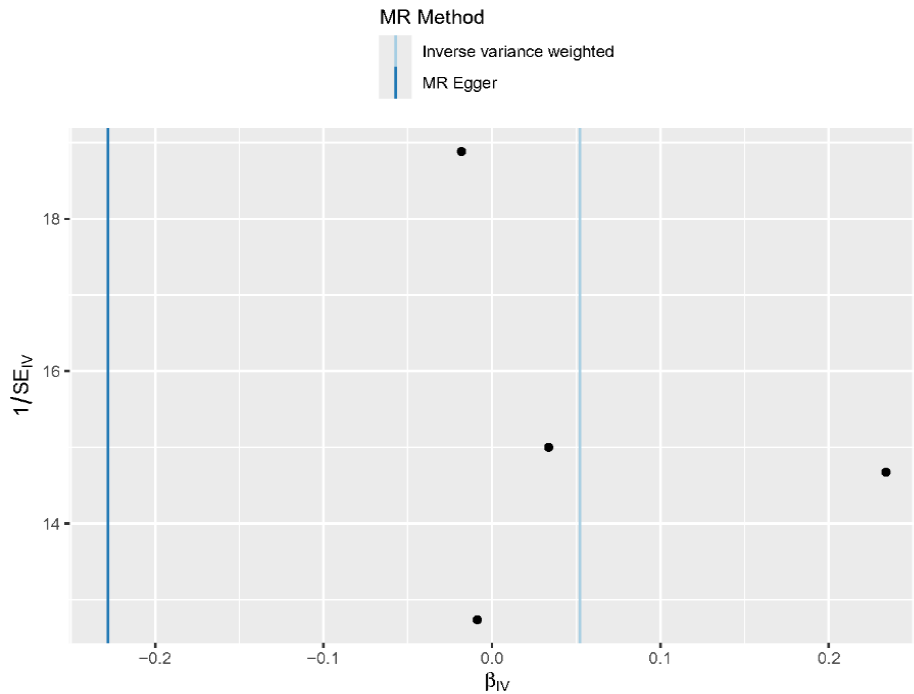

**Figure S7a.**

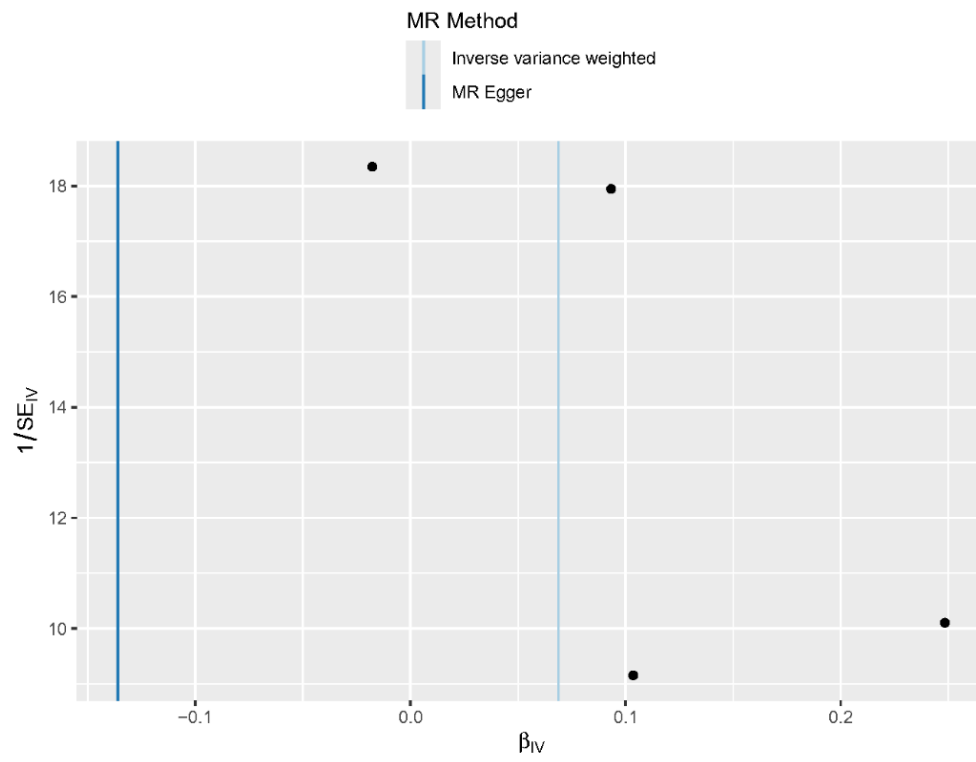

**Figure S7b.**

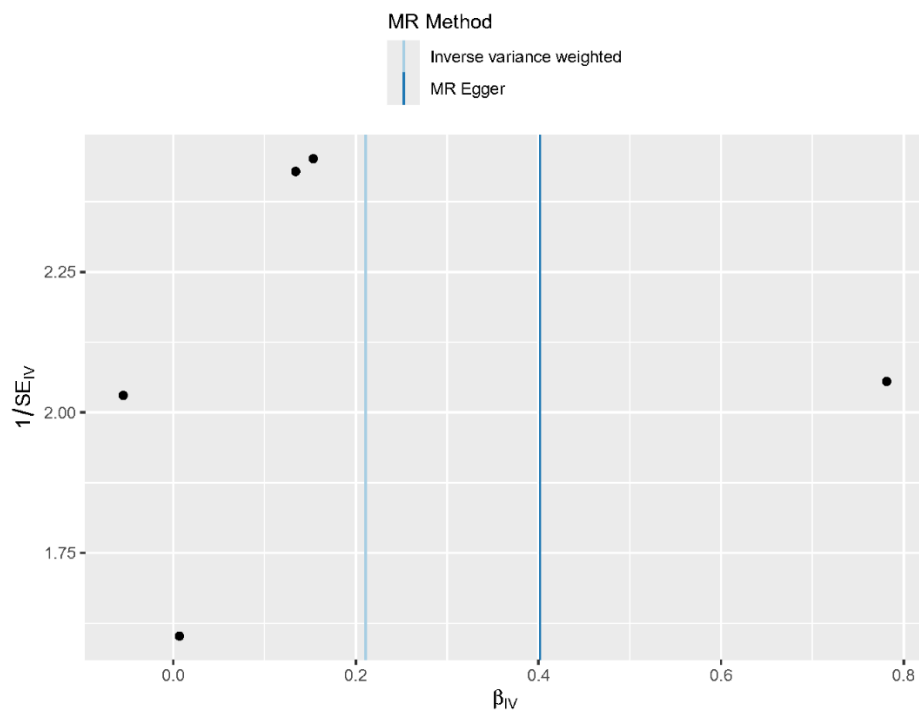

**Figure S7c.**

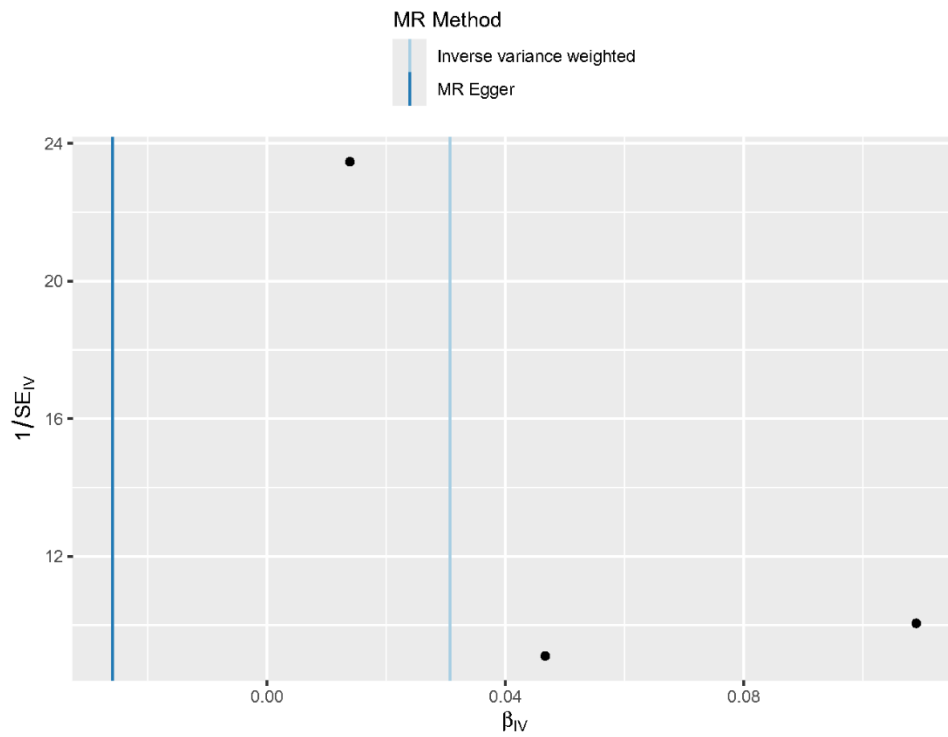

**Figure S7d.**

**Figure S7.** Funnel plot for SFAs and MUFAs on ADHD.

(A) Funnel plot for SFA 16:0 on ADHD. (B) Funnel plot for SFA 16:1n7 on ADHD. (C) Funnel plot for MUFA 18:0 on ADHD (D) Funnel plot for MUFA 18:1n9 on ADHD.

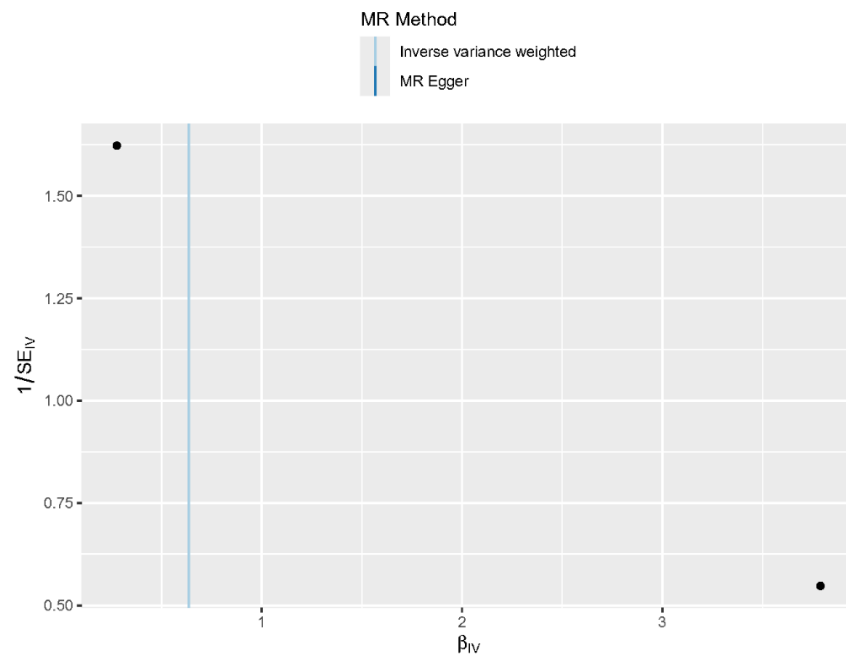

**Figure S8a.**

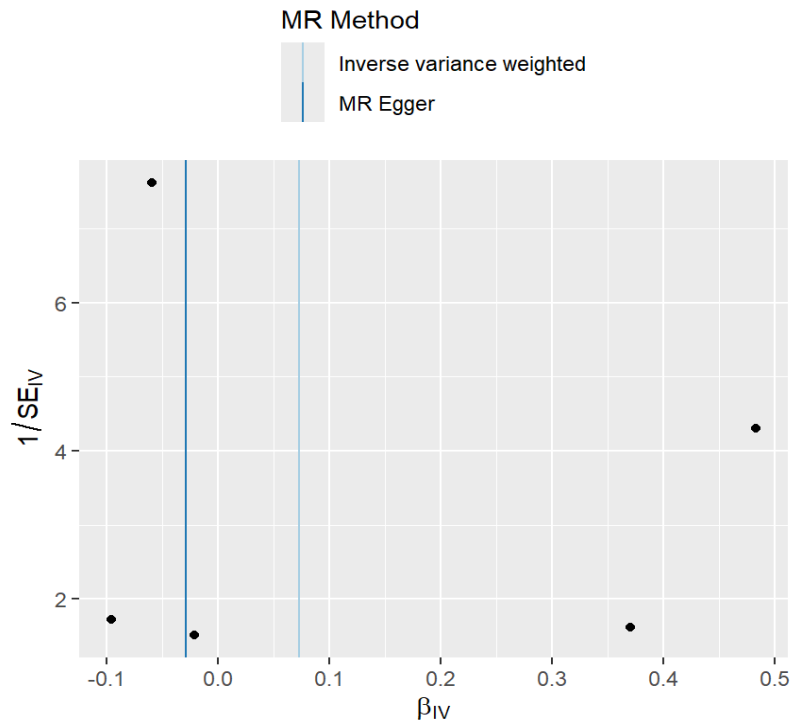

**Figure S8b.**

**Figure S8.** Funnel plot for n-3 PUFAs on ADHD.

(A) Funnel plot for ALA on ADHD. (B) Funnel plot for DPA on ADHD.

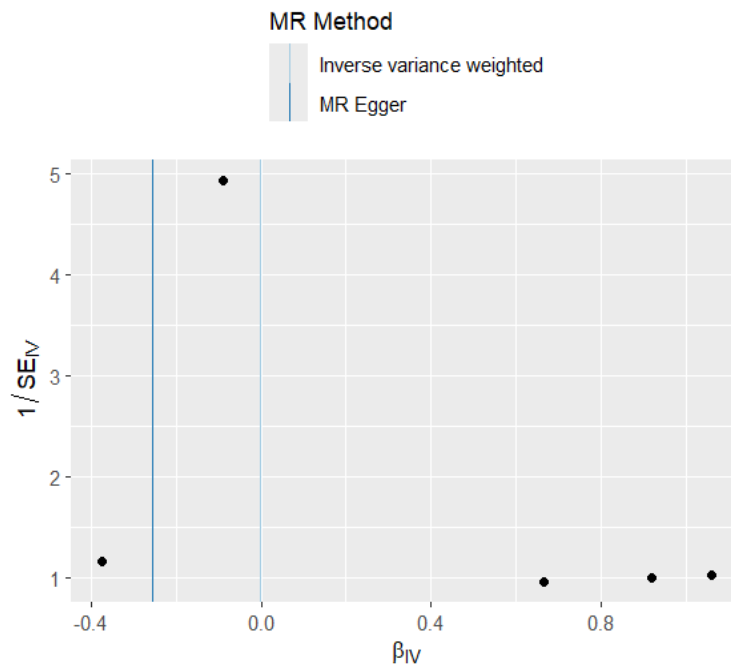

**Figure S9a.**

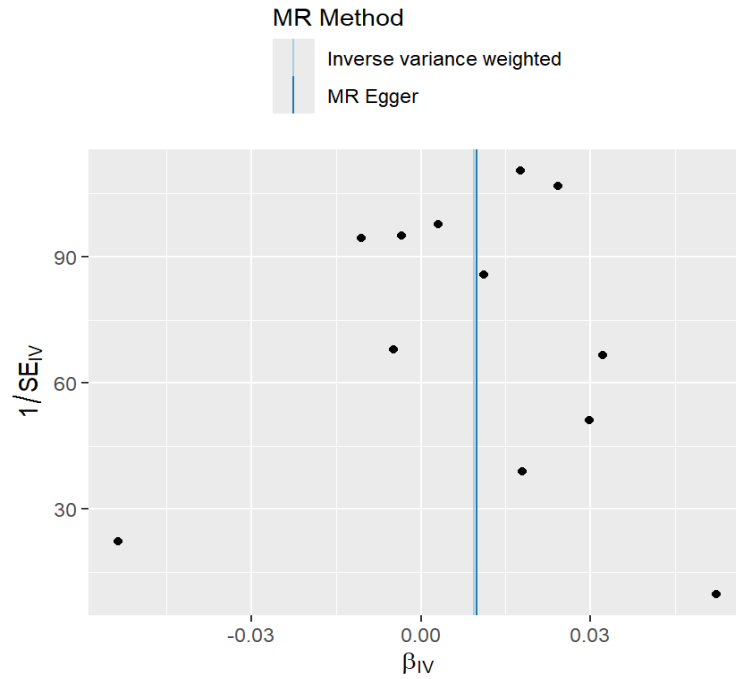

**Figure S9b.**

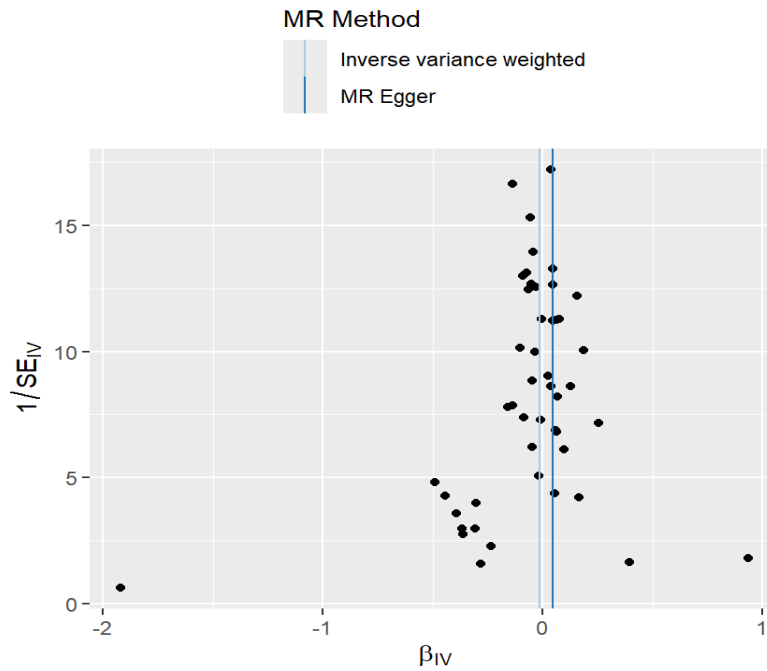

**Figure S9c.**

**Figure S9.** Funnel plot for n-6 PUFAs on ADHD.

(A) Funnel plot for n-6 Adrenic A on ADHD. (B) Funnel plot for n-6 DGLA on ADHD. (C) Funnel plot for n-6 GLA on ADHD.

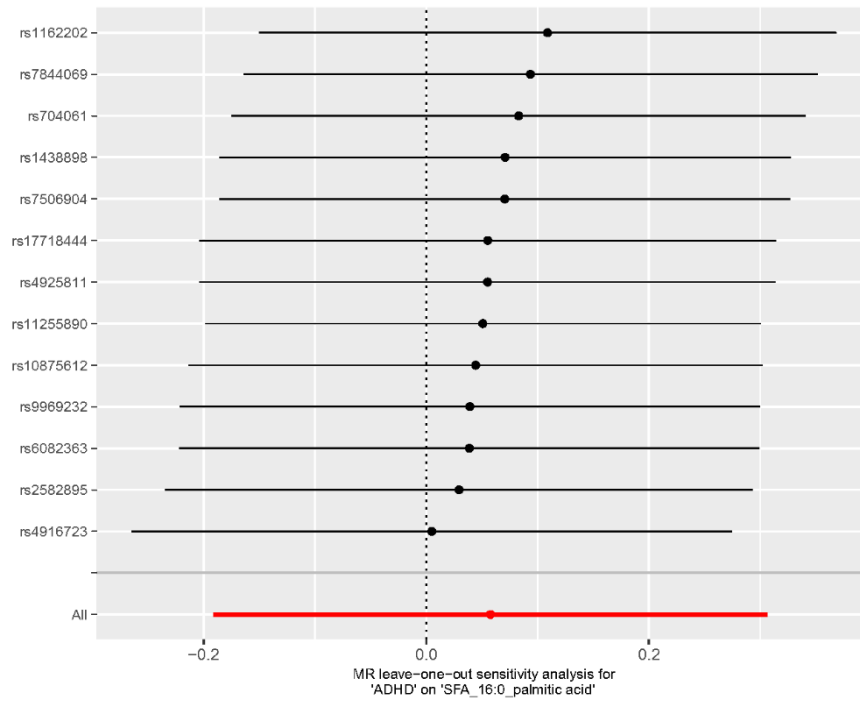

**Figure S50a.**

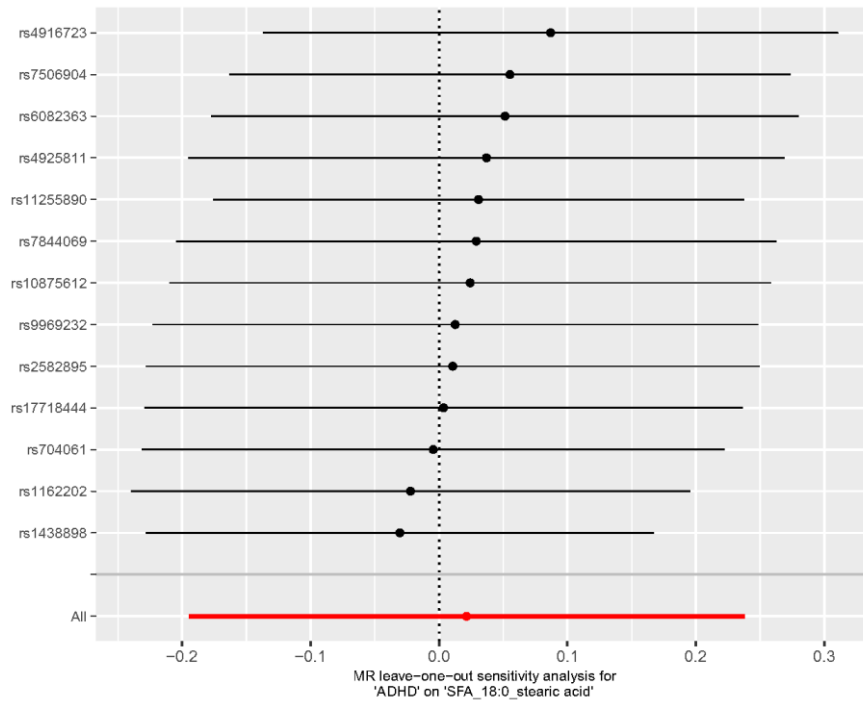

**Figure S60b.**



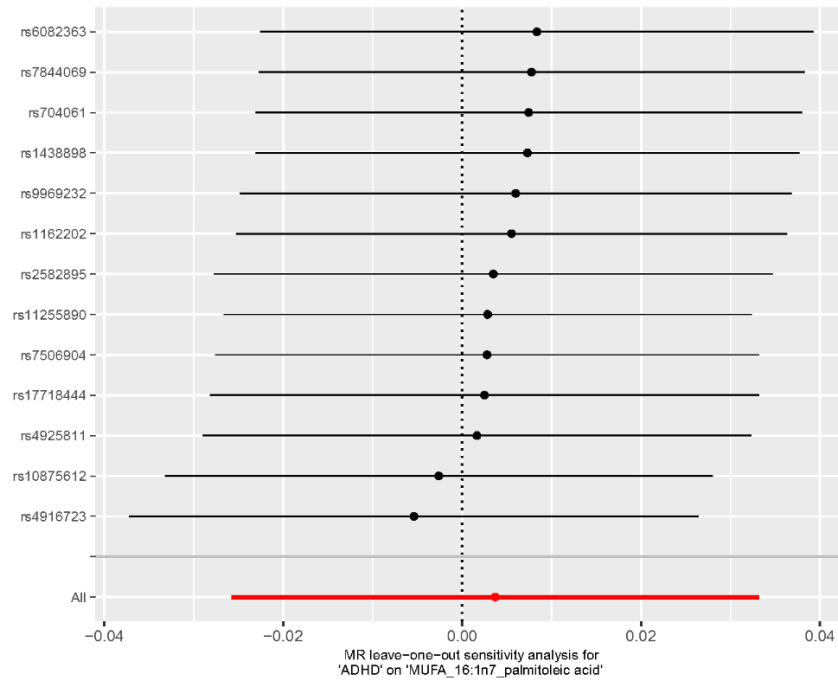

**Figure S70c.**

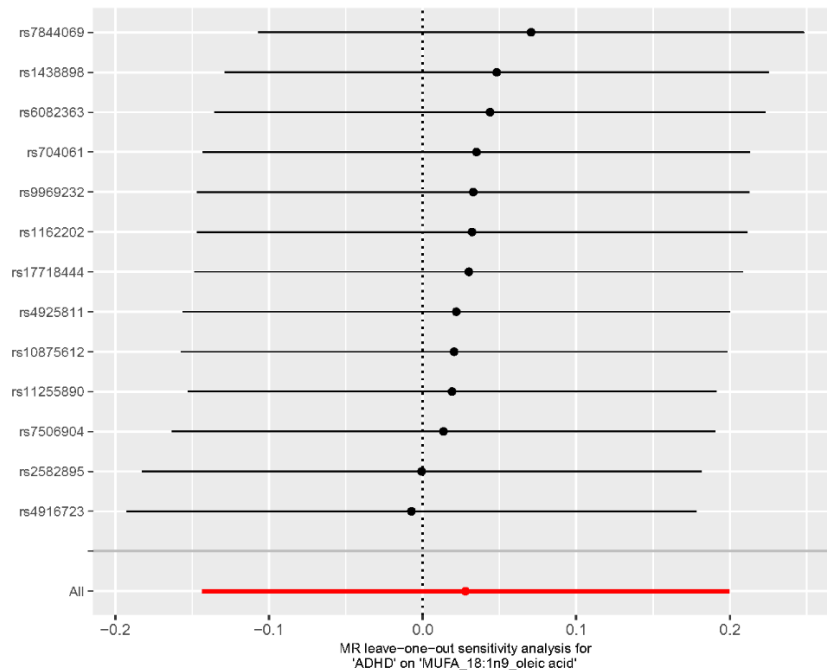

**Figure S80d.**

**Figure S10.** Leave-one-out graph for ADHD on SFAs and MUFAs.

(A) Leave-one-out graph for SFA 16:0 on ADHD. (B) Leave-one-out graph for SFA 18:0 on ADHD. (C) Leave-one-out graph for MUFA 16:1n7 on ADHD. (D) Leave-one-out graph for MUFA 18:1n9 on ADHD.

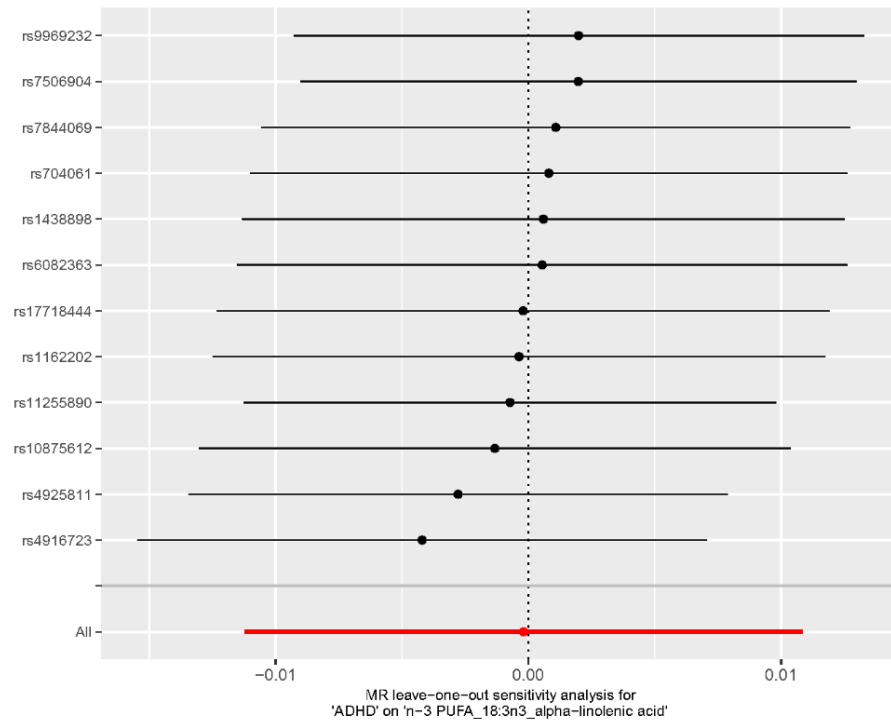

**Figure S11a.**

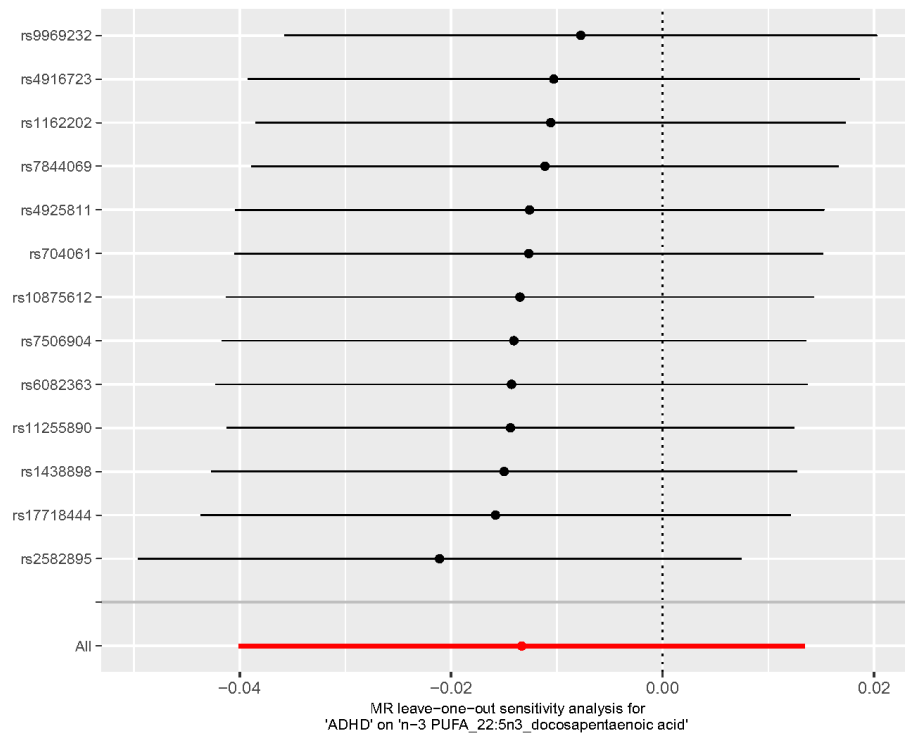

**Figure S11b.**

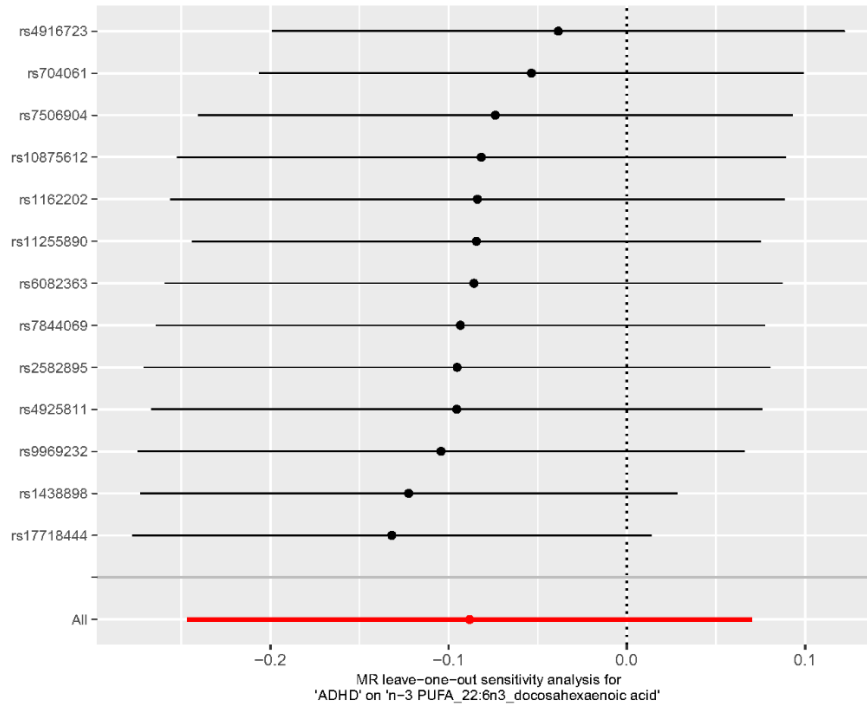

**Figure S11c.**

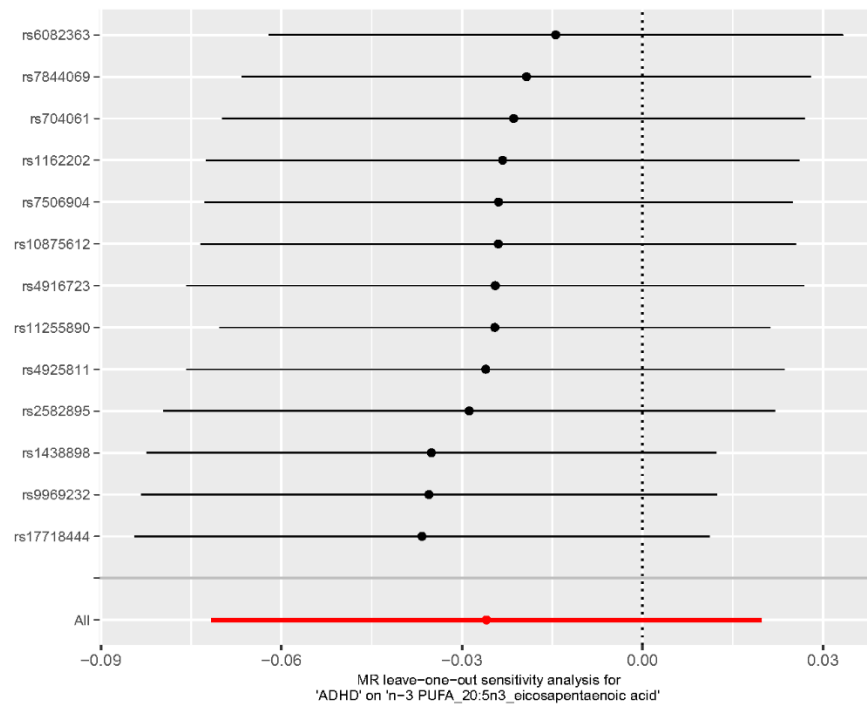

**Figure S11d.**

**Figure S11.** Leave-one-out graph for ADHD on n-3 PUFAs.

- (A) Leave-one-out graph for n-3 ALA on ADHD.
- (B) Leave-one-out graph for n-3 DPA on ADHD.
- (C) Leave-one-out graph for n-3 DHA on ADHD.
- (D) Leave-one-out graph for n-3 EPA on ADHD.

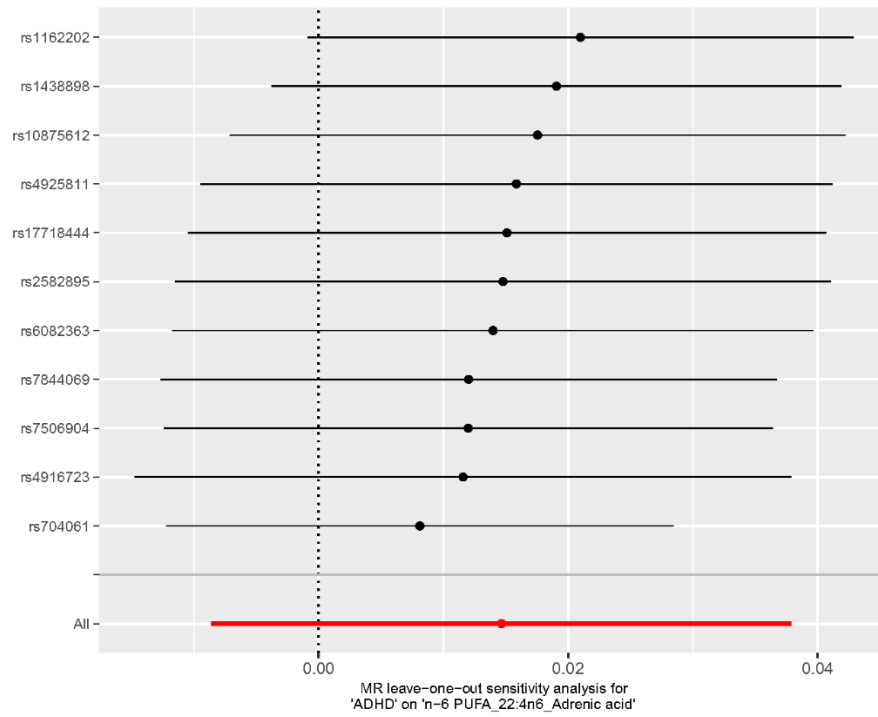

**Figure S12a.**

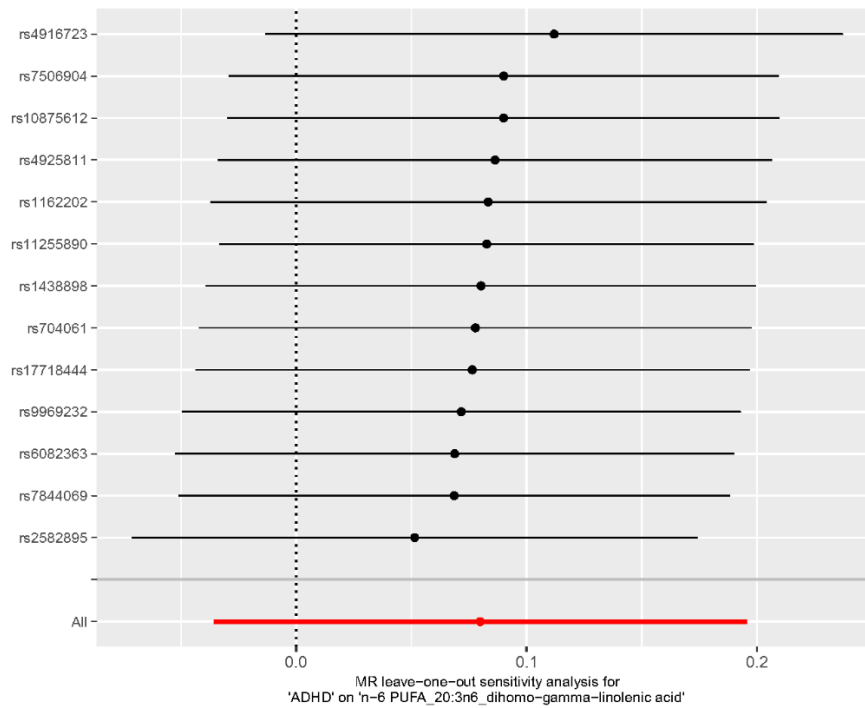

**Figure S12b.**

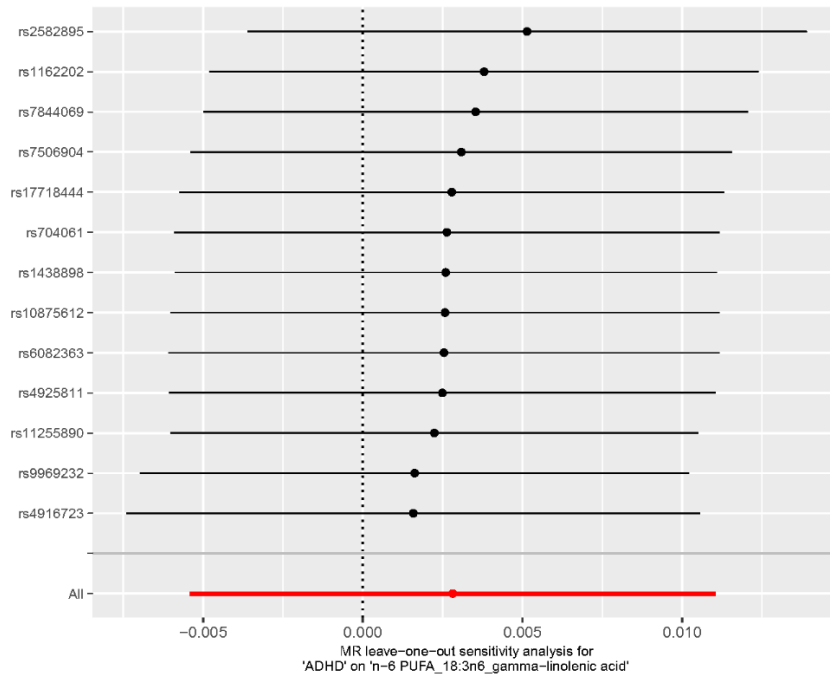

**Figure S12c.**

**Figure S12.** Leave-one-out graph for ADHD on n-6 PUFAs.

(A) Leave-one-out graph for n-6 Adrenic A on ADHD. (B) Leave-one-out graph for n-6 DGLA on ADHD. (C) Leave-one-out graph for n-6 GLA on ADHD.

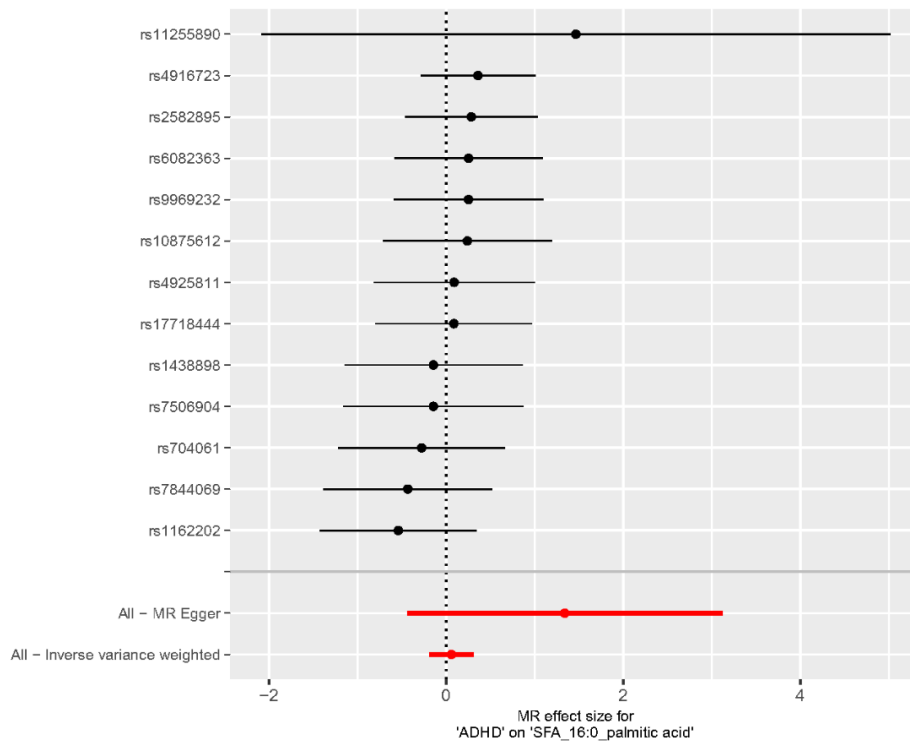

**Figure S13a.**

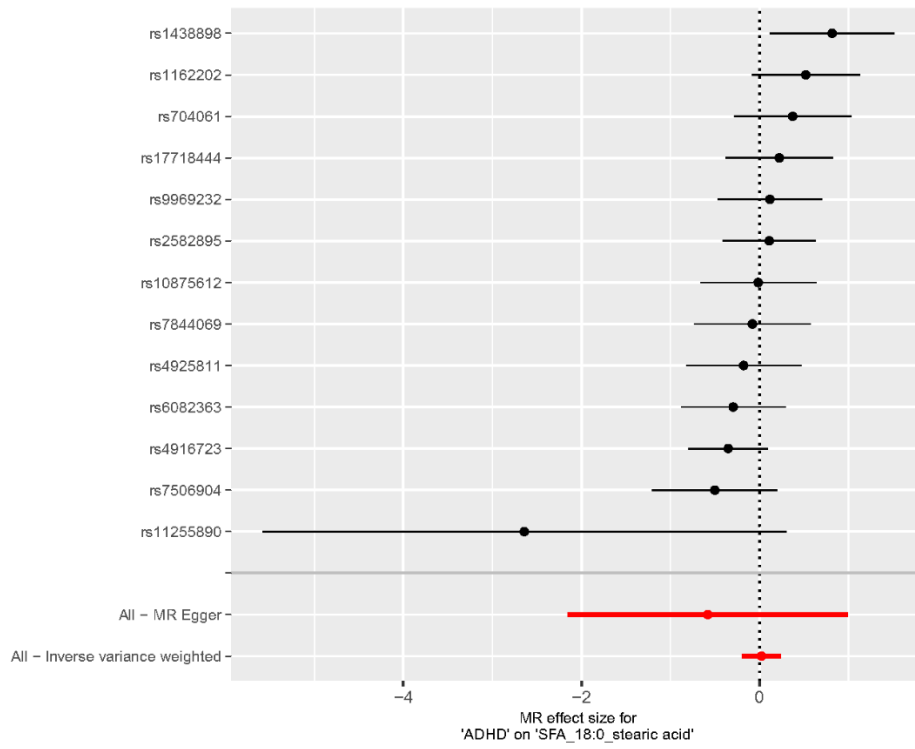

**Figure S13b.**

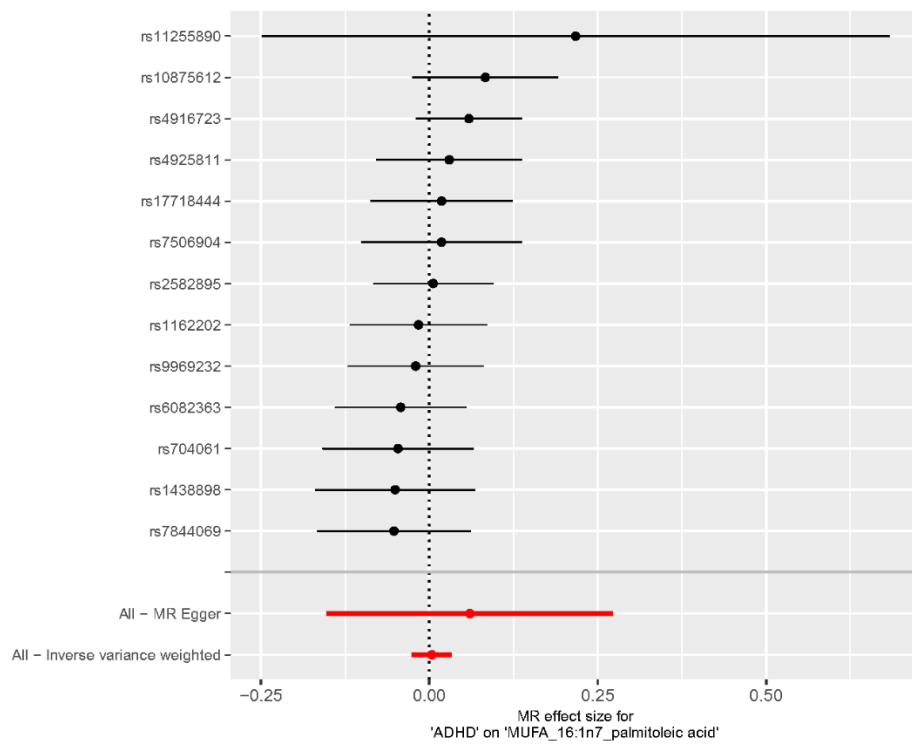

**Figure S13c.**

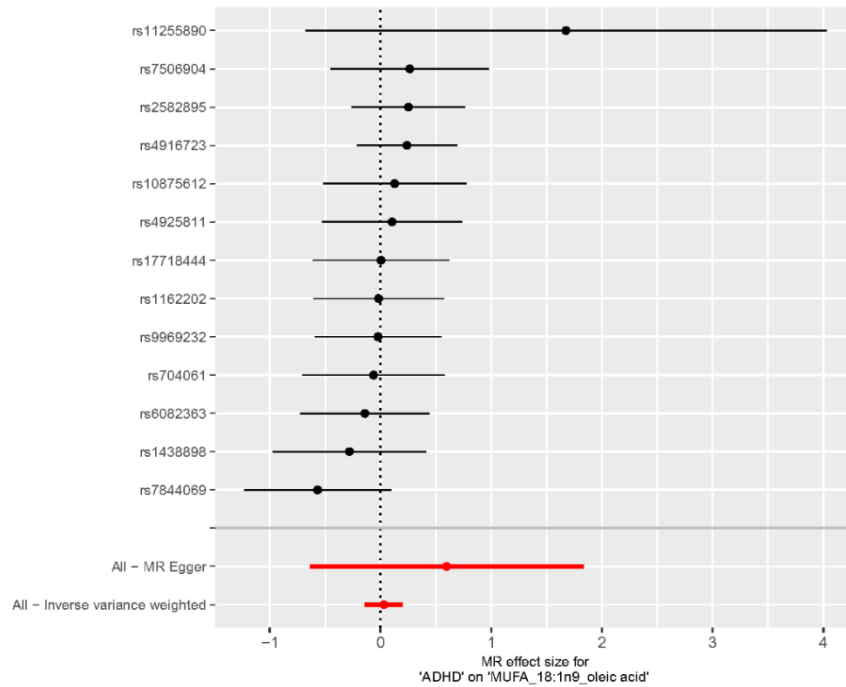

**Figure S13d.**

**Figure S13.** Forest plot for ADHD on SFAs and MUFAs.

(A) Forest plot for SFA 16:0 on ADHD. (B) Forest plot for SFA 16:1n7 on ADHD. (C) Forest plot for MUFA 18:0 on ADHD (D) Forest plot for MUFA 18:1n9 on ADHD.

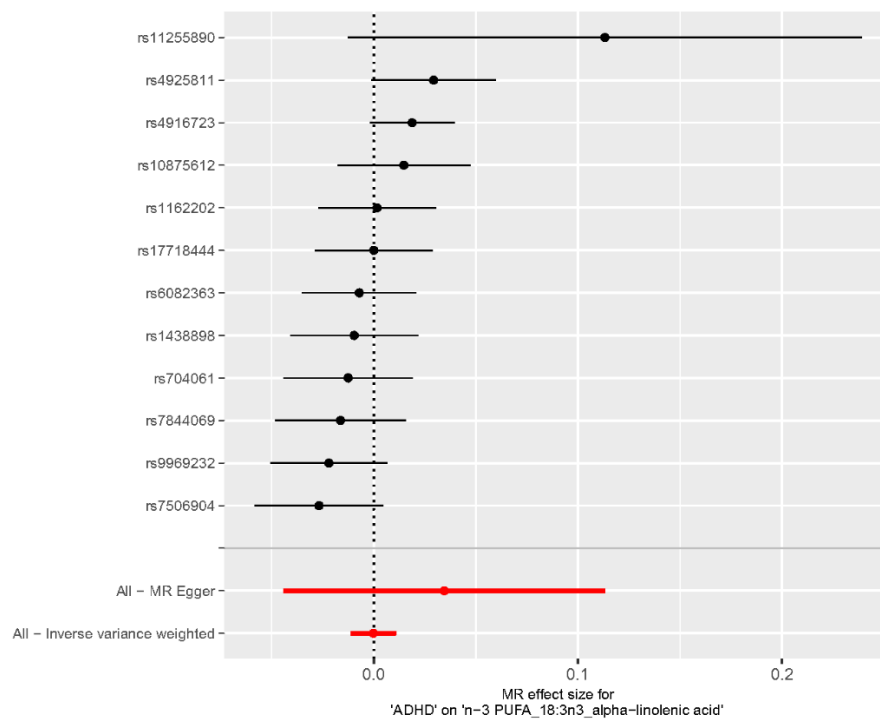

**Figure S14a.**

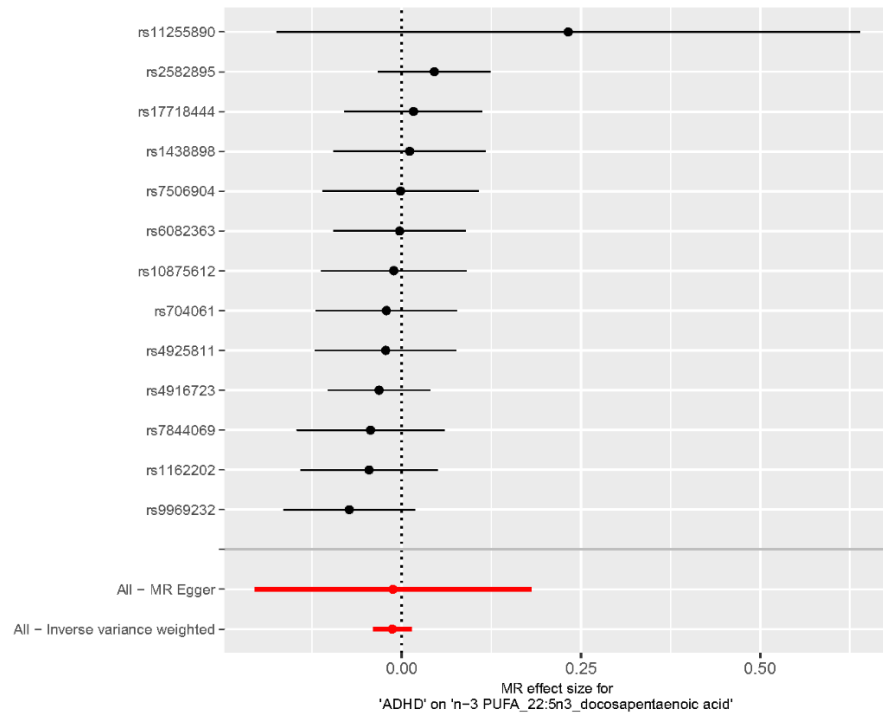

**Figure S14b.**

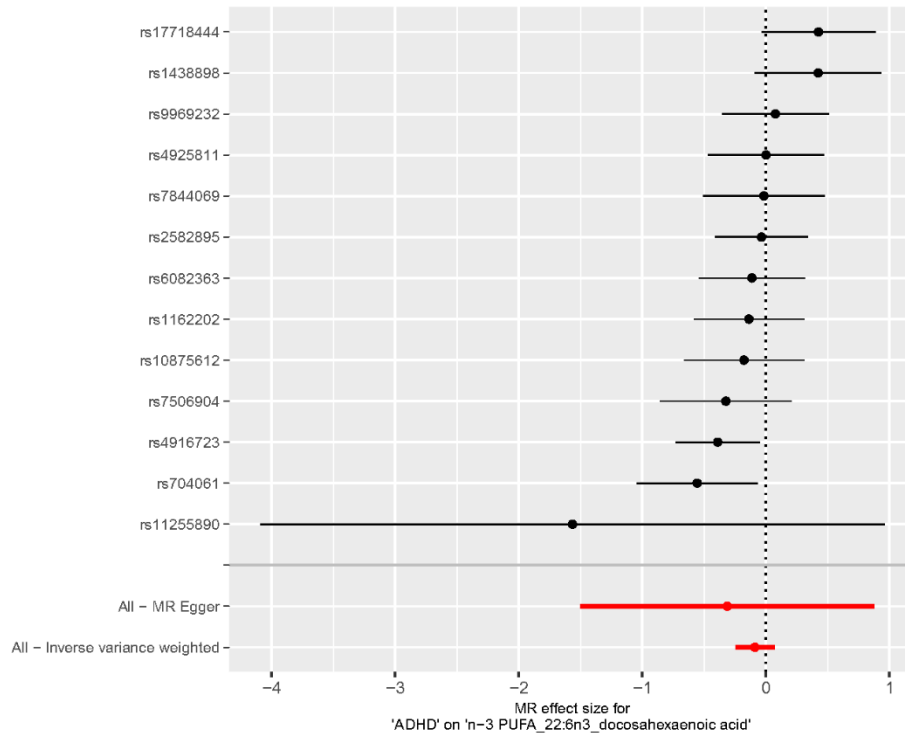

**Figure S14c.**



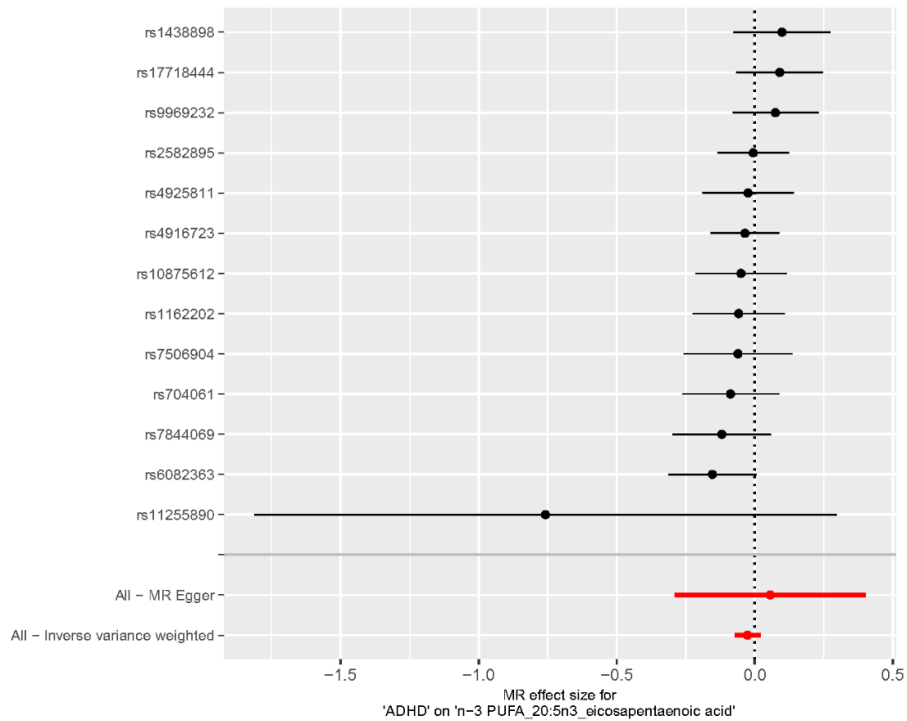

**Figure S14d.**

**Figure S14.** Forest plot for ADHD on n-3 PUFAs.

- (A) Leave-one-out graph for n-3 ALA on ADHD.
- (B) Leave-one-out graph for n-3 DPA on ADHD.
- (C) Leave-one-out graph for n-3 DHA on ADHD.
- (D) Leave-one-out graph for n-3 EPA on ADHD.

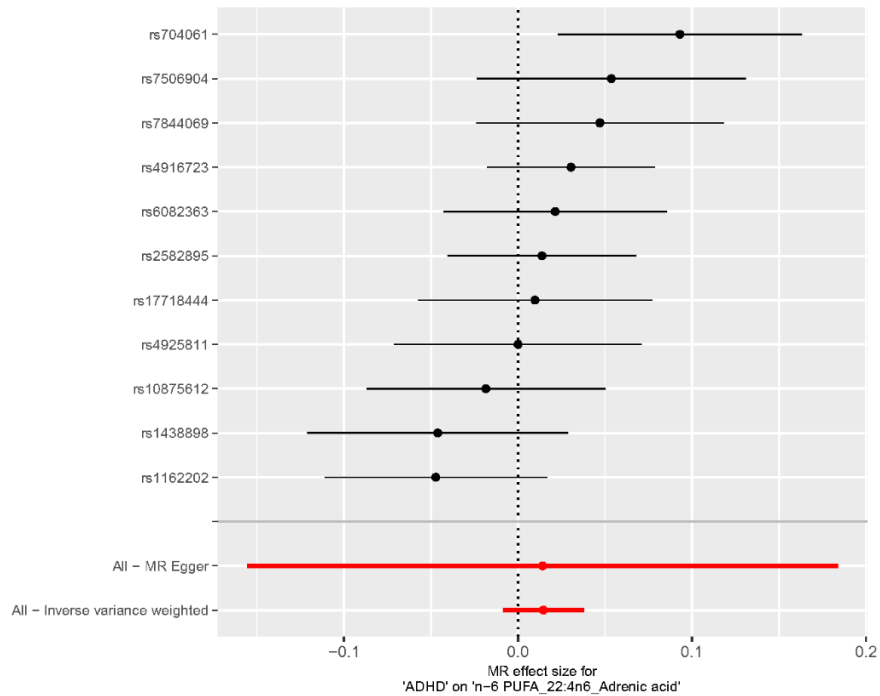

**Figure S15a.**

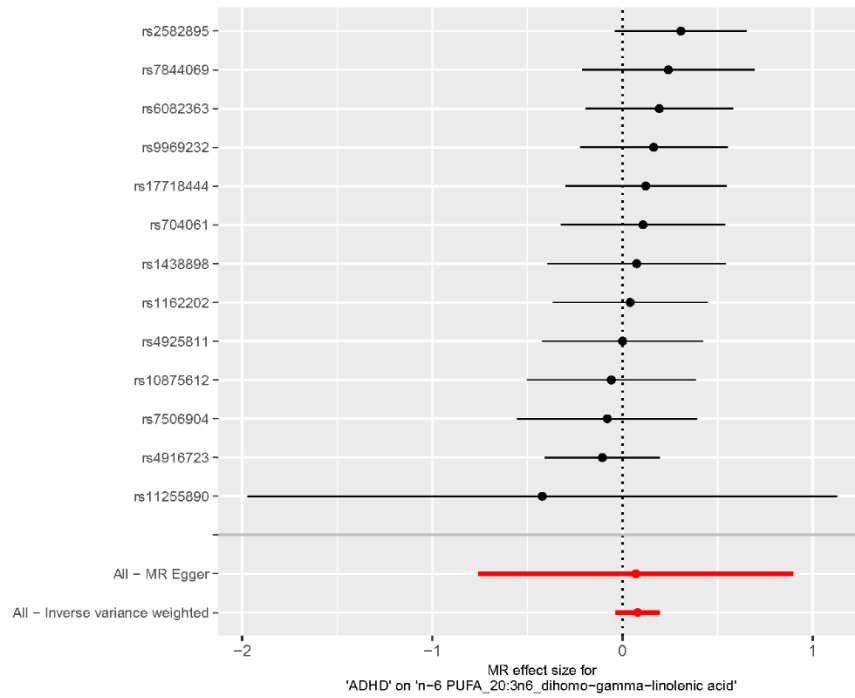

**Figure S15b.**

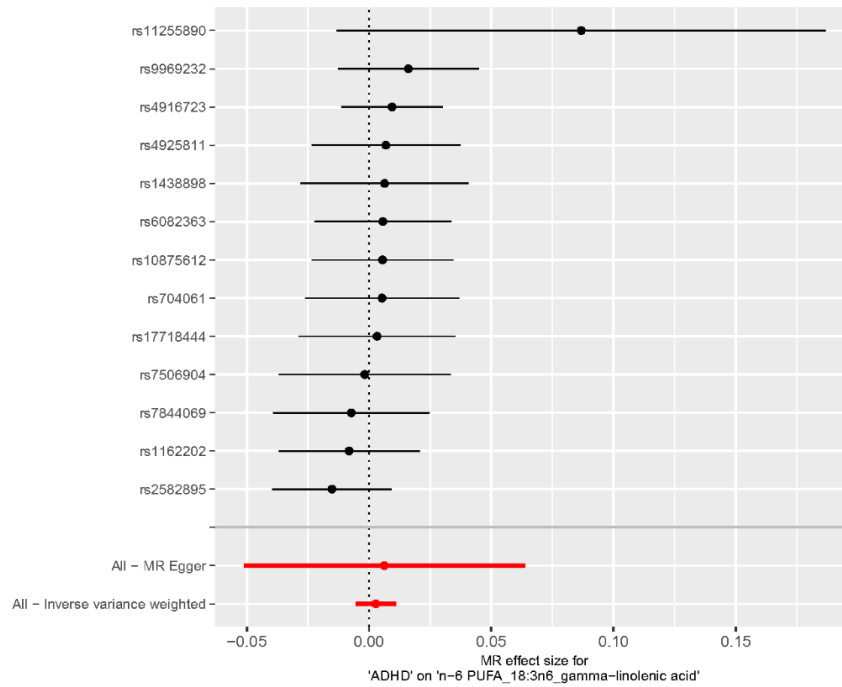

**Figure S15c.**

**Figure S15.** Forest plot for ADHD on n-6 PUFAs.

(B) Forest plot for n-6 Adrenic A on ADHD. (B) Forest plot for n-6 DGLA on ADHD. (C) Forest plot for n-6 GLA on ADHD.

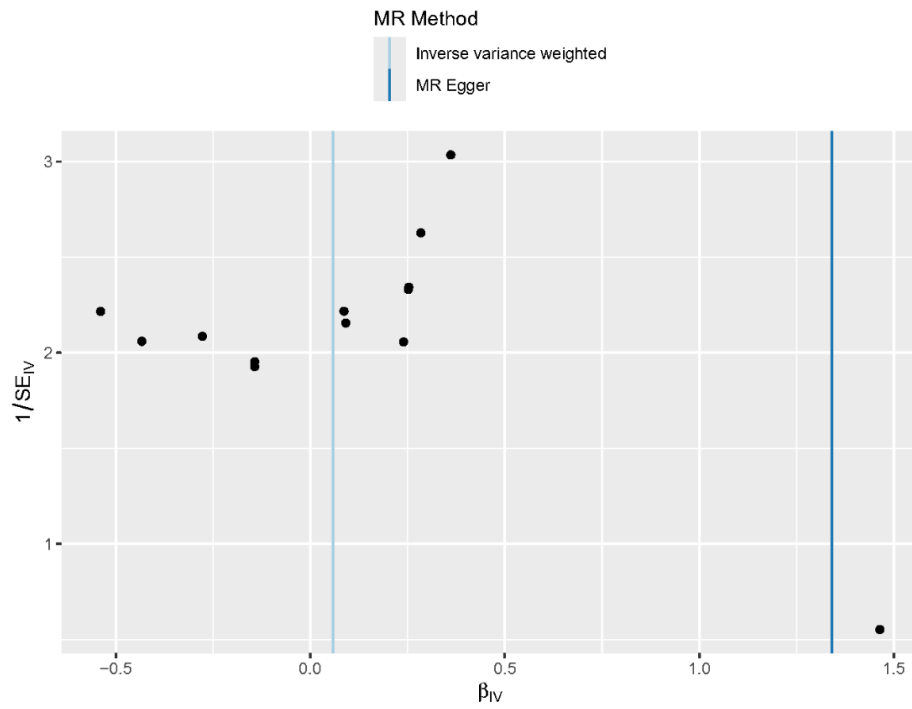

**Figure S16a.**

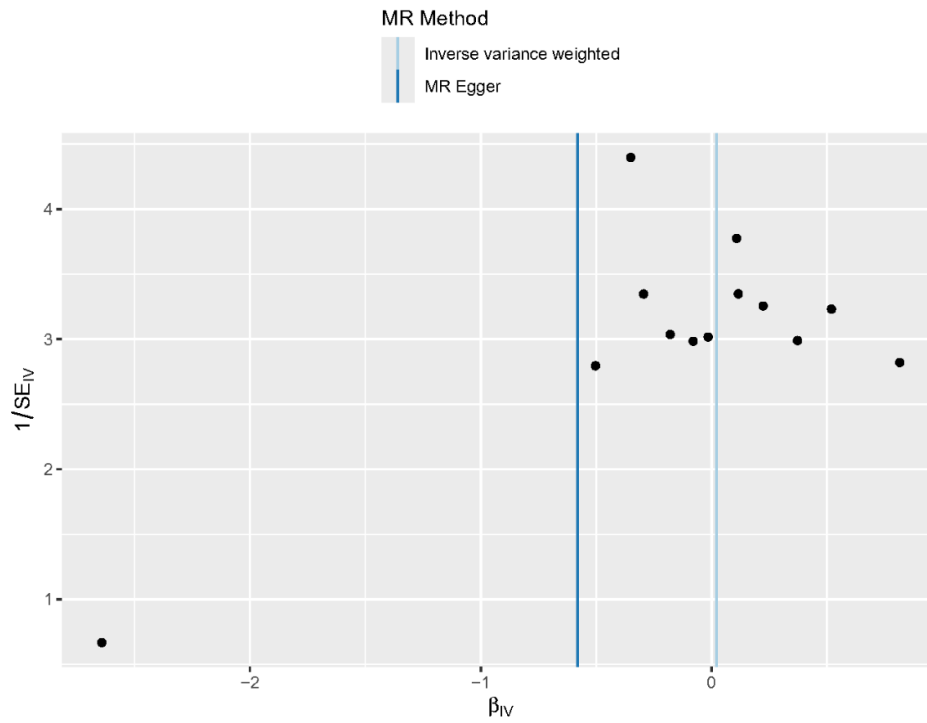

**Figure S16b.**

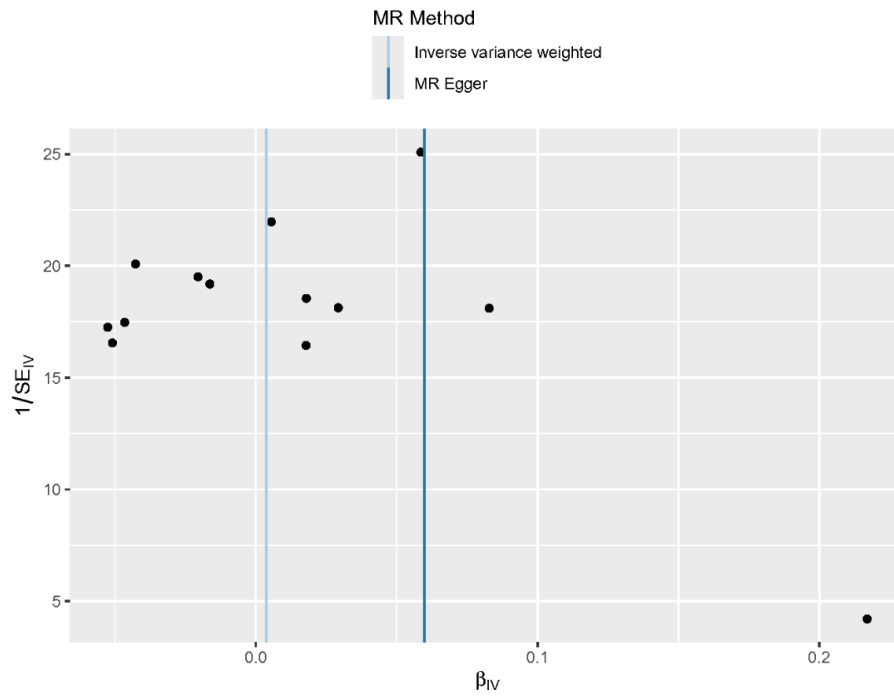

**Figure S16c.**

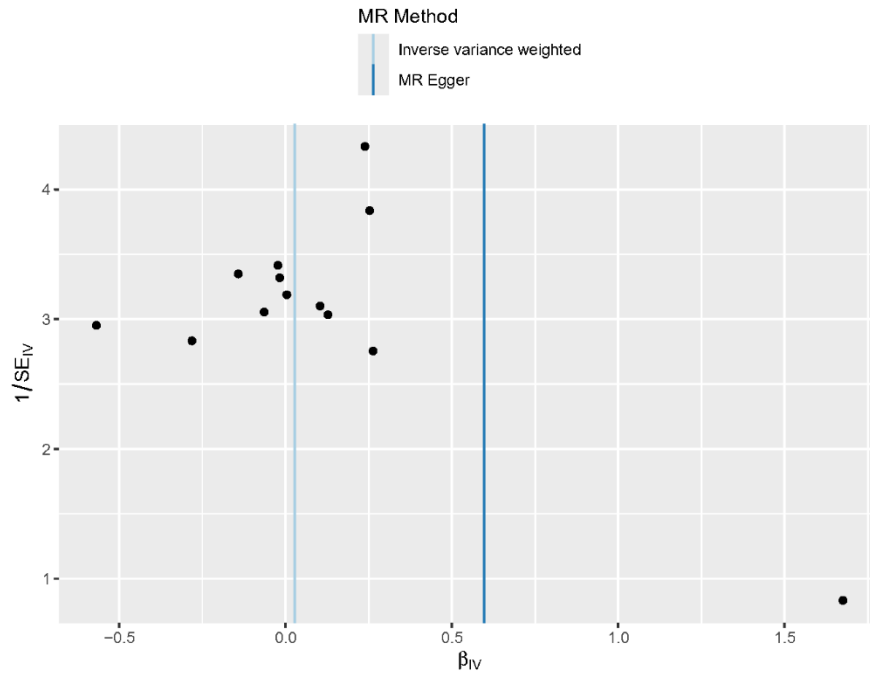

**Figure S16d.**

**Figure S16.** Funnel plot for ADHD on SFAs and MUFAs.

(A) Funnel plot for SFA 16:0 on ADHD. (B) Funnel plot for SFA 16:1n7 on ADHD. (C) Funnel plot for MUFA 18:0 on ADHD (D) Funnel plot for MUFA 18:1n9 on ADHD.

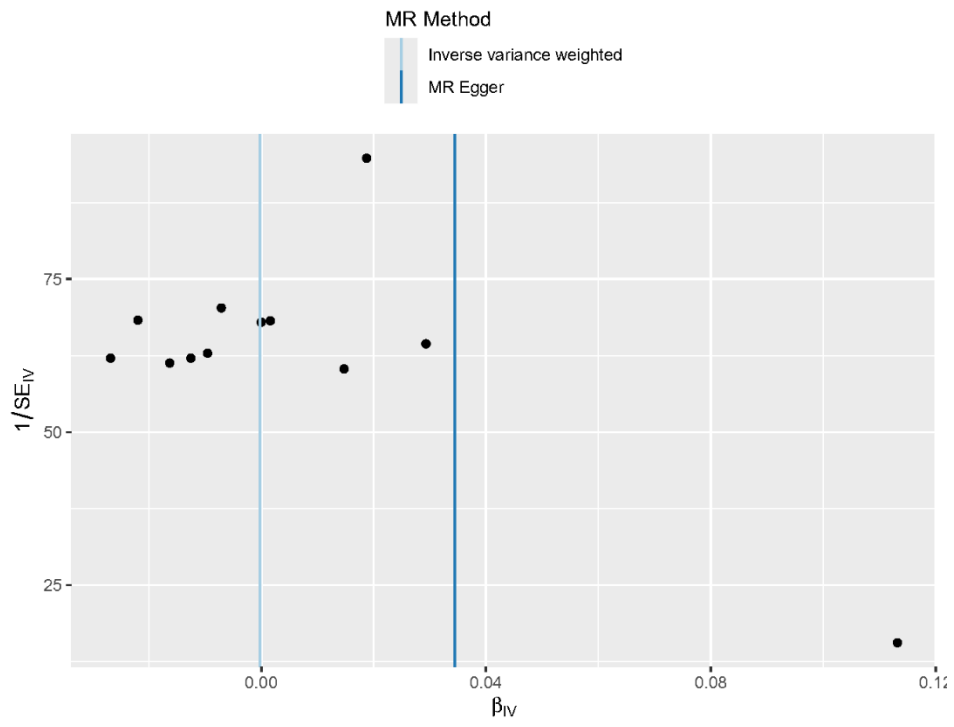

**Figure S17a.**

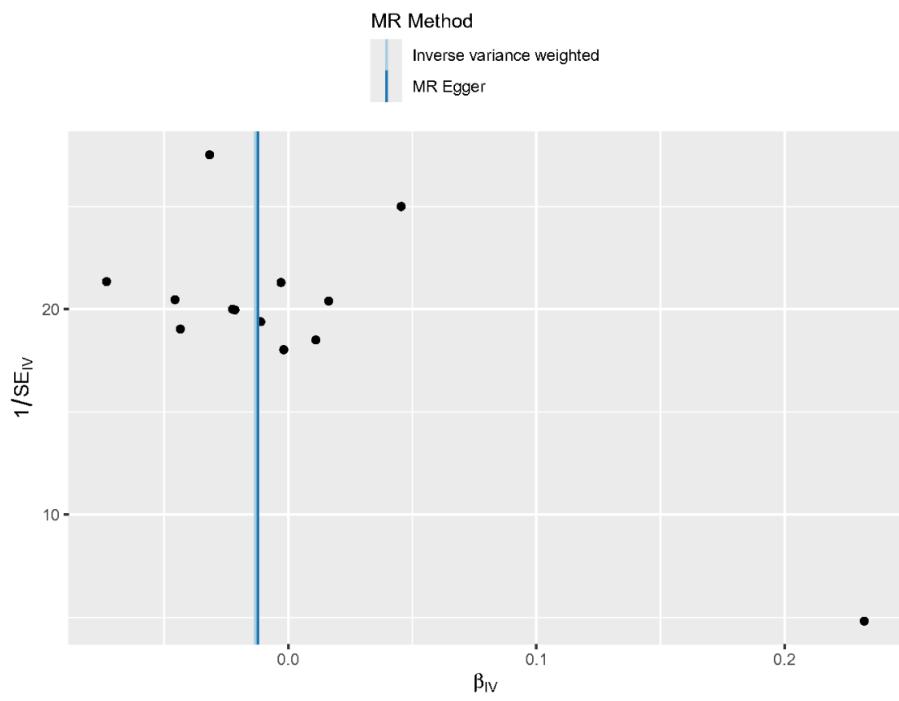

**Figure S17b.**

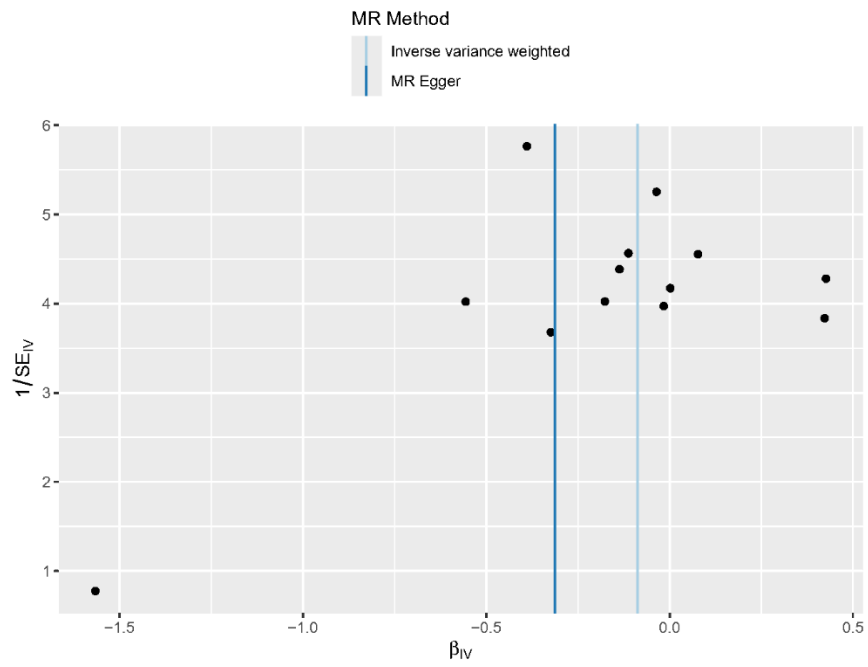

**Figure S17c.**

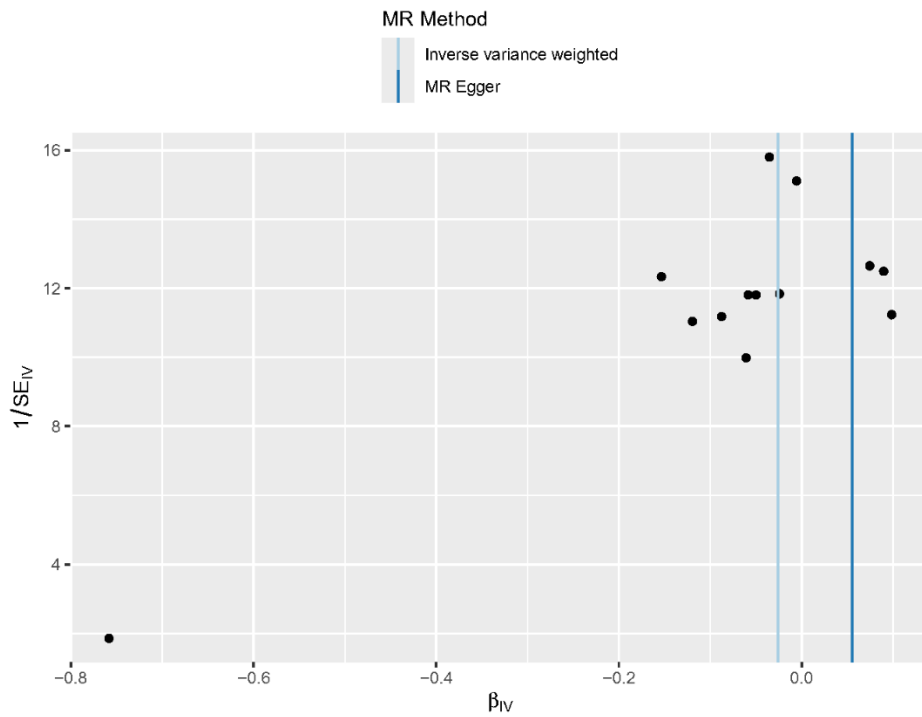

**Figure S17d.**

**Figure S17.** Funnel plot for ADHD on n-3 PUFAs.

(A) Leave-one-out graph for n-3 ALA on ADHD. (B) Leave-one-out graph for n-3 DPA on ADHD. (C) Leave-one-out graph for n-3 DHA on ADHD. (D) Leave-one-out graph for n-3 EPA on ADHD.

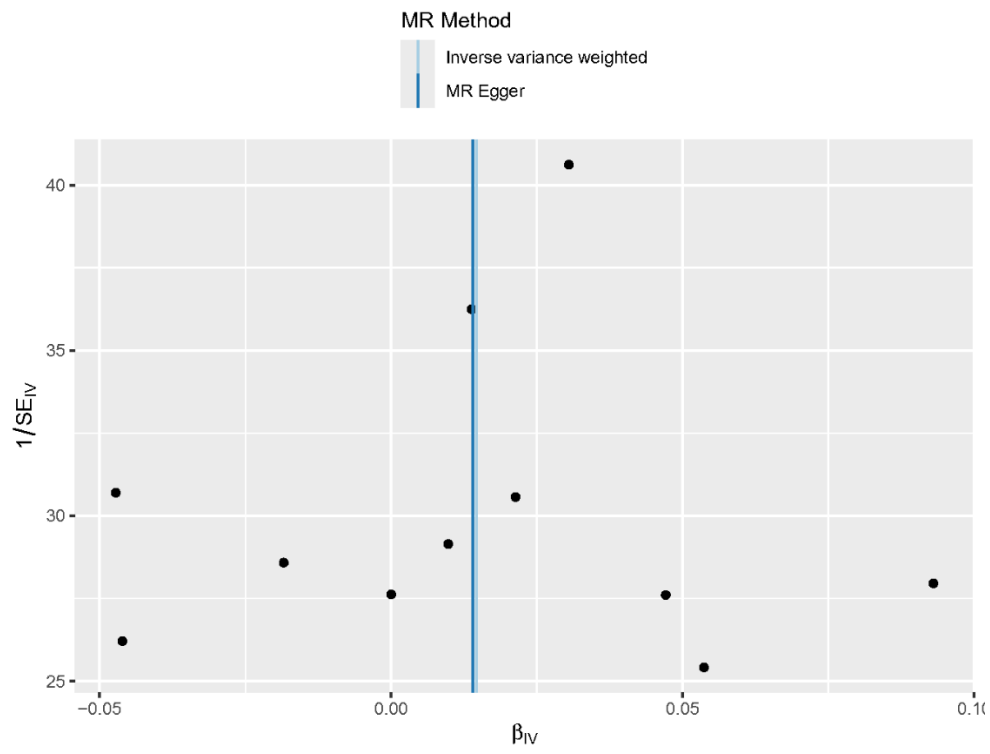

**Figure S18a.**

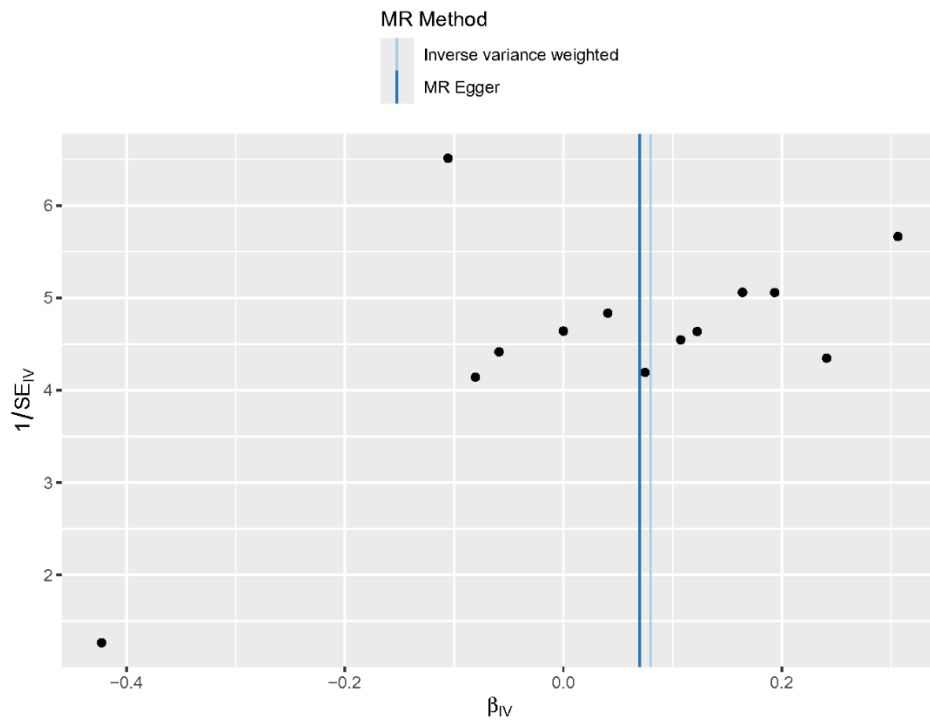

**Figure S18b.**

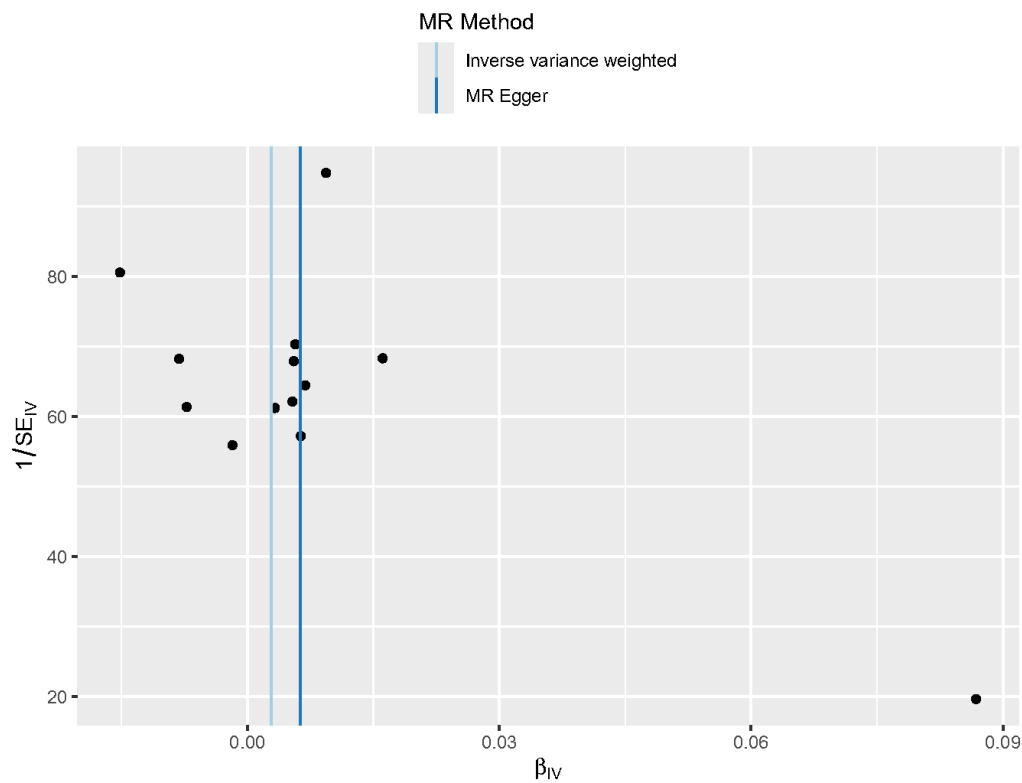

**Figure S18c.**

**Figure S18.** Funnel plot for ADHD on n-6 PUFAs.

(A) Funnel plot for n-6 Adrenic A on ADHD. (B) Funnel plot for n-6 DGLA on ADHD. (C) Funnel plot for n-6 GLA on ADHD.

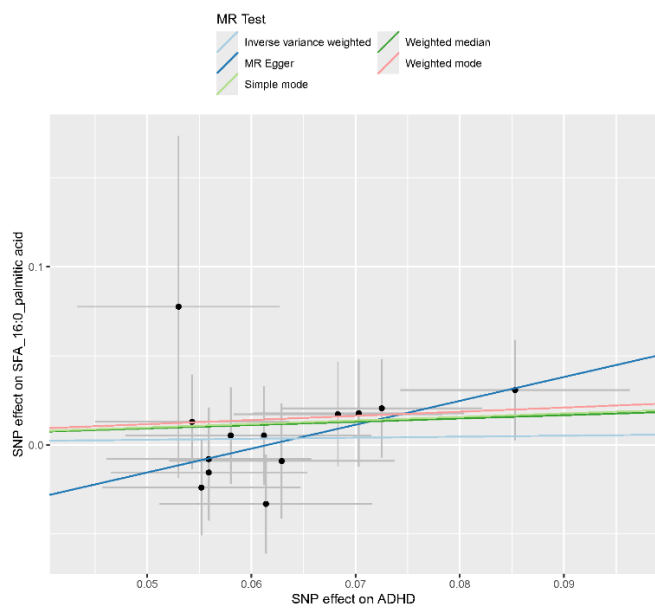

**Figure S19a.**



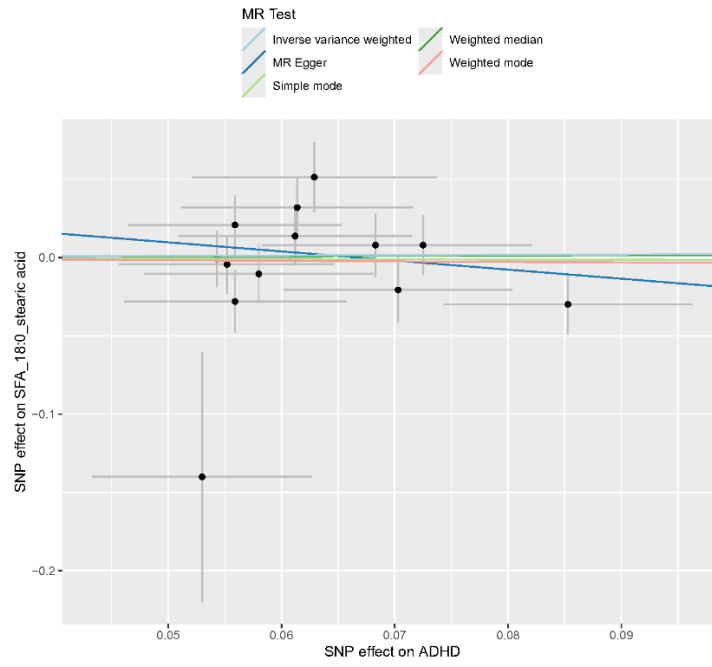

**Figure S19b.**

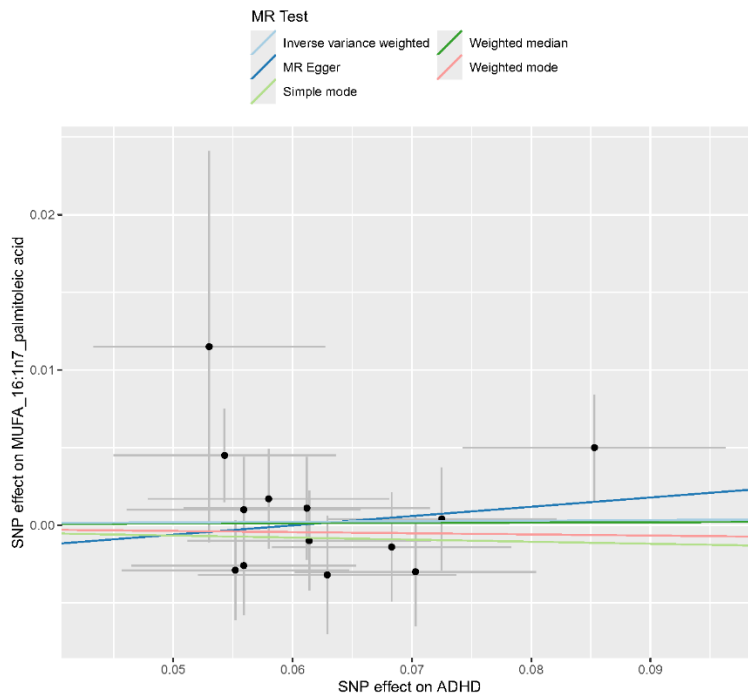

**Figure S19c.**

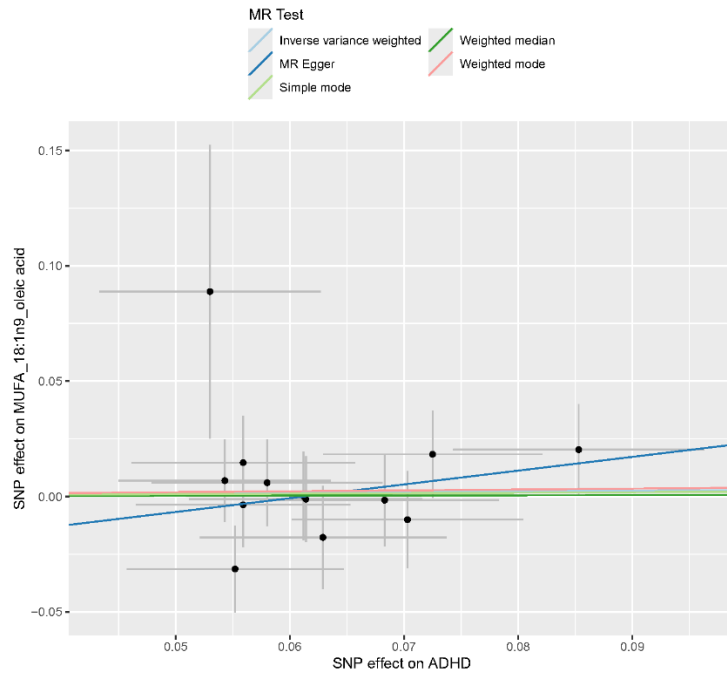

**Figure S19d.**

**Figure S19.** Scatter plots for ADHD on SFA and MUFA.

(A) Scatter plots for ADHD on 16:0. (B) Scatter plots for ADHD on 18:0. (C) Scatter plots for ADHD on 16:1n7. (D) Scatter plots for ADHD on 18:1n9.

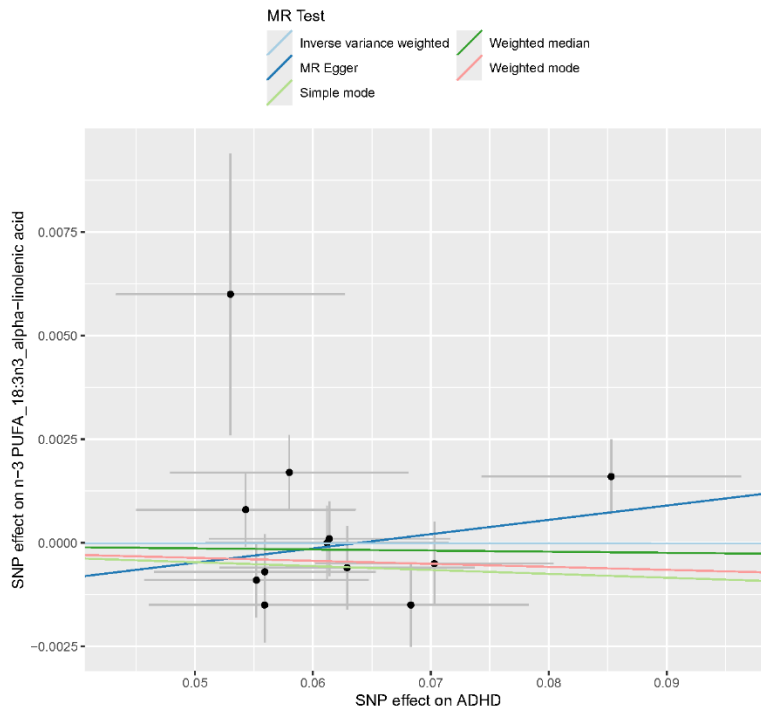

**Figure S20a.**

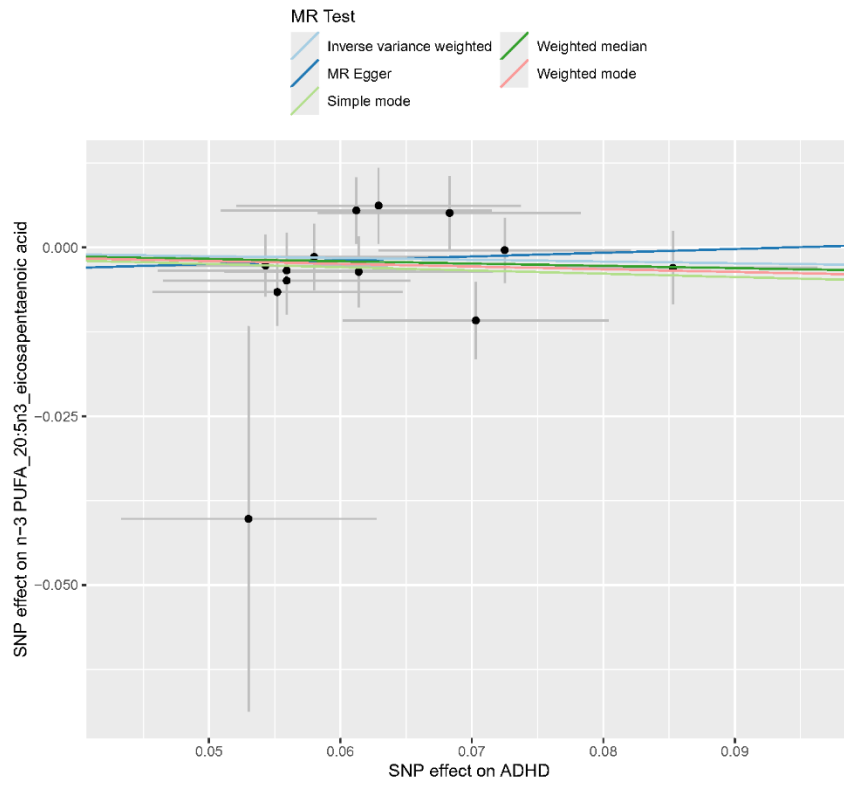

**Figure S20b.**

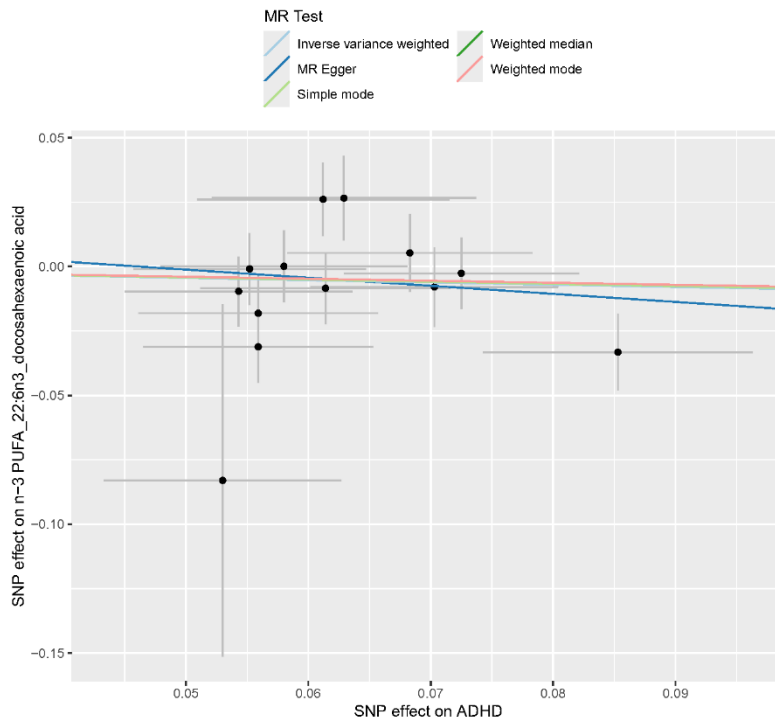

**Figure S20c.**

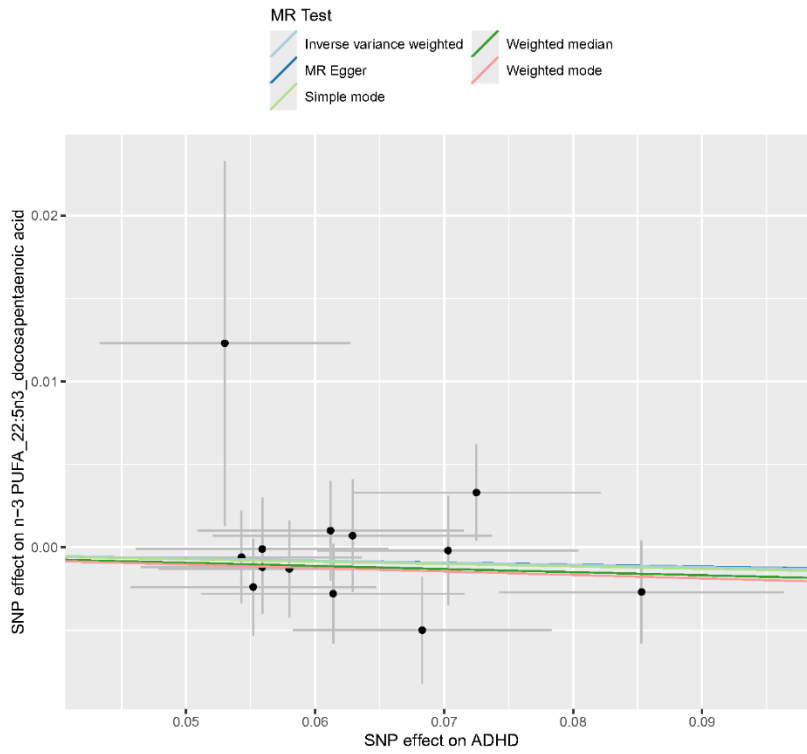

**Figure S20d.**

**Figure S20.** Scatter plots for ADHD on n-3PUFA.

(A) Scatter plots for ADHD on ALA. (B) Scatter plots for ADHD on EPA. (C) Scatter plots for ADHD on DHA. (D) Scatter plots for ADHD on DPA.

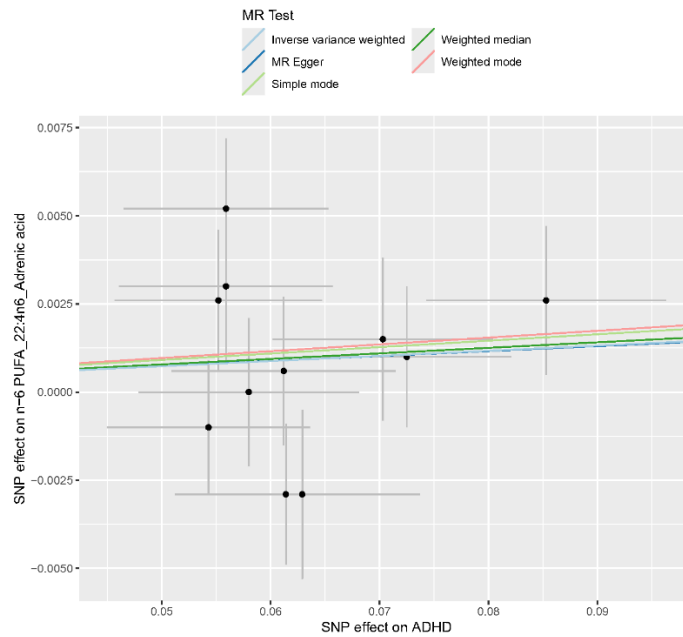

**Figure S21a.**

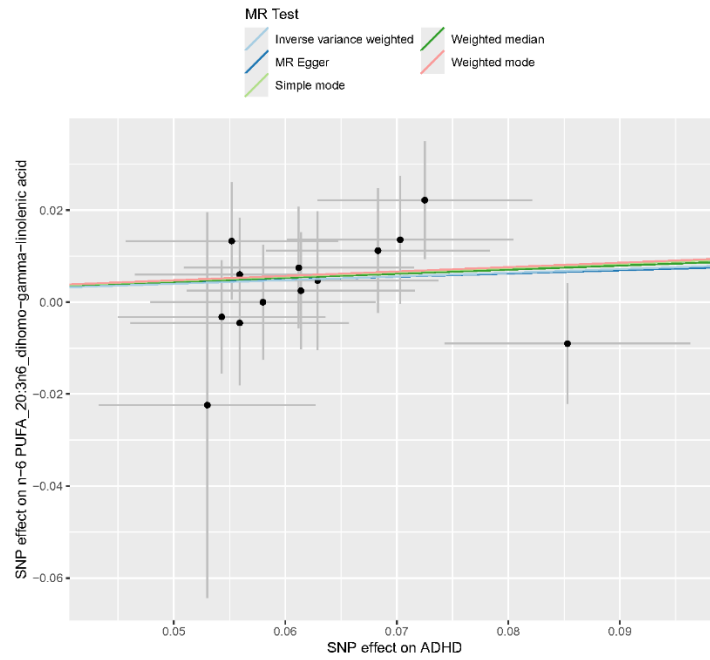

**Figure S21b.**

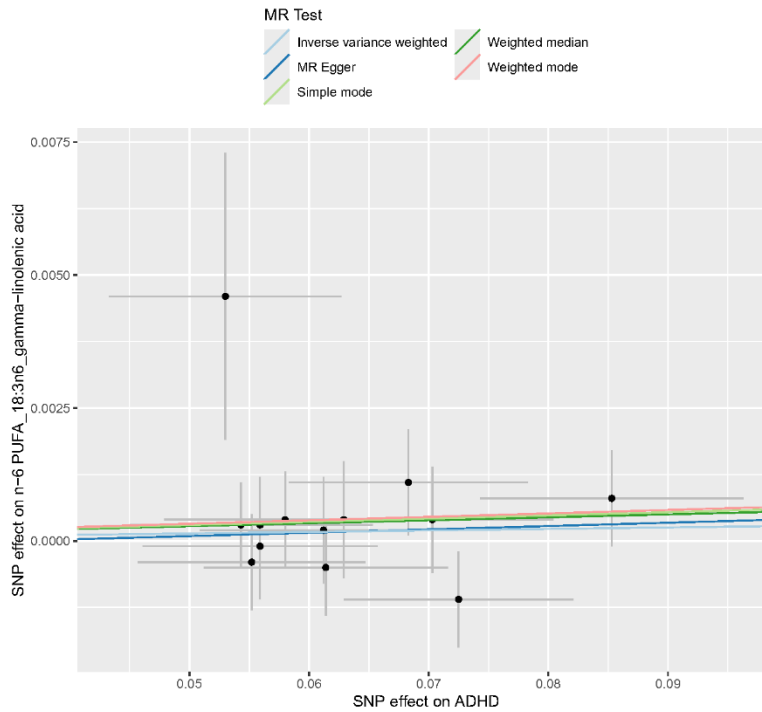

**Figure S21c.**

**Figure S21.** Scatter plots for ADHD on n-6PUFA.

(A) Scatter plots for ADHD on AdrA. (B) Scatter plots for ADHD on DGLA. (C) Scatter plots for ADHD on GLA.

## 1.2 Supplementary Tables

**Table S1. 4 valid IVs used for MR analysis of SFA 16:0 on ADHD**

| <b>SNP</b> | <b>Effect allele</b> | <b>Other allele</b> | <b>Effect allele frequency</b> | <b>Beta</b> | <b>SE</b> | <b>P value</b> | <b>R2</b> | <b>F</b> |
|------------|----------------------|---------------------|--------------------------------|-------------|-----------|----------------|-----------|----------|
| rs10809457 | T                    | G                   | 0.4077                         | -0.1394     | 0.0284    | 9.30E-07       | 0.0013    | 11.4638  |
| rs2391388  | A                    | C                   | 0.5494                         | -0.1775     | 0.0266    | 2.72E-11       | 0.0025    | 22.2326  |
| rs780093   | T                    | C                   | 0.4145                         | 0.1261      | 0.0269    | 2.65E-06       | 0.0012    | 10.6346  |
| rs994988   | T                    | C                   | 0.5333                         | -0.1395     | 0.0269    | 2.10E-07       | 0.0015    | 13.3523  |

**Table S2. 4 valid IVs used for MR analysis of SFA 18:0 on ADHD**

| <b>SNP</b> | <b>Effect allele</b> | <b>Other allele</b> | <b>Effect allele frequency</b> | <b>Beta</b> | <b>SE</b> | <b>P value</b> | <b>R2</b> | <b>F</b> |
|------------|----------------------|---------------------|--------------------------------|-------------|-----------|----------------|-----------|----------|
| rs102275   | T                    | C                   | 0.3636                         | 0.1798      | 0.0193    | 1.33E-20       | 0.0045    | 40.3387  |
| rs742614   | A                    | G                   | 0.4646                         | -0.095      | 0.0186    | 3.37E-07       | 0.0014    | 12.994   |
| rs6675668  | T                    | G                   | 0.4899                         | -0.1651     | 0.0189    | 2.16E-18       | 0.0042    | 38.2937  |
| rs4555772  | A                    | G                   | 0.4545                         | 0.0888      | 0.0192    | 3.93E-06       | 0.0011    | 10.617   |

**Table S3. 5 valid IVs used for MR analysis of MUFA 16:1n7 on ADHD**

| <b>SNP</b> | <b>Effect allele</b> | <b>Other allele</b> | <b>Effect allele frequency</b> | <b>Beta</b> | <b>SE</b> | <b>P value</b> | <b>R2</b> | <b>F</b> |
|------------|----------------------|---------------------|--------------------------------|-------------|-----------|----------------|-----------|----------|
| rs102275   | T                    | C                   | 0.3636                         | -0.0238     | 0.0033    | 6.60E-13       | 0.0027    | 24.13164 |
| rs7597155  | A                    | G                   | 0.4697                         | 0.0149      | 0.0032    | 4.58E-06       | 0.001211  | 10.8112  |
| rs780093   | T                    | C                   | 0.4091                         | 0.0201      | 0.0033    | 9.80E-10       | 0.002012  | 17.96862 |
| rs603424   | A                    | G                   | 0.202                          | -0.0326     | 0.0042    | 5.69E-15       | 0.002178  | 19.46124 |
| rs3750720  | T                    | C                   | 0.202                          | 0.0224      | 0.004     | 1.58E-08       | 0.001134  | 10.11942 |

**Table S4. 3 valid IVs used for MR analysis of MUFA 18:1n9 on ADHD**

| <b>SNP</b> | <b>Effect allele</b> | <b>Other allele</b> | <b>Effect allele frequency</b> | <b>Beta</b> | <b>SE</b> | <b>P value</b> | <b>R2</b> | <b>F</b> |
|------------|----------------------|---------------------|--------------------------------|-------------|-----------|----------------|-----------|----------|
| rs102275   | T                    | C                   | 0.6716                         | -0.23       | 0.0194    | 2.19E-32       | 0.007296  | 65.51171 |
| rs3134950  | A                    | C                   | 0.6272                         | -0.0945     | 0.0194    | 1.14E-06       | 0.001296  | 11.56655 |
| rs4731889  | A                    | G                   | 0.4515                         | -0.0856     | 0.0187    | 4.59E-06       | 0.001161  | 10.35708 |

**Table S5. 2 valid IVs used for MR analysis of n-3 ALA on ADHD**

| <b>SNP</b> | <b>Effect allele</b> | <b>Other allele</b> | <b>Effect allele frequency</b> | <b>Beta</b> | <b>SE</b> | <b>P value</b> | <b>R2</b> | <b>F</b> |
|------------|----------------------|---------------------|--------------------------------|-------------|-----------|----------------|-----------|----------|
| rs174547   | T                    | C                   | 0.3586                         | -0.0159     | 9.00E-04  | 3.47E-64       | 0.016194  | 145.9053 |
| rs367543   | T                    | C                   | 0.4848                         | 0.0052      | 0.0011    | 1.29E-06       | 0.001259  | 11.17478 |

**Table S6. 1 valid IVs used for MR analysis of n-3 EPA on ADHD**

| <b>SNP</b> | <b>Effect allele</b> | <b>Other allele</b> | <b>Effect allele frequency</b> | <b>Beta</b> | <b>SE</b> | <b>P value</b> | <b>R2</b> | <b>F</b> |
|------------|----------------------|---------------------|--------------------------------|-------------|-----------|----------------|-----------|----------|
| rs174538   | A                    | G                   | 0.3384                         | -0.0834     | 0.0052    | 5.37E-58       | 0.012991  | 116.6708 |

**Table S7. 5 valid IVs used for MR analysis of n-3 DPA on ADHD**

| <b>SNP</b> | <b>Effect allele</b> | <b>Other allele</b> | <b>Effect allele frequency</b> | <b>Beta</b> | <b>SE</b> | <b>P value</b> | <b>R2</b> | <b>F</b> |
|------------|----------------------|---------------------|--------------------------------|-------------|-----------|----------------|-----------|----------|
| rs780094   | T                    | C                   | 0.4091                         | 0.0167      | 0.0029    | 9.04E-09       | 0.001808  | 16.05826 |
| rs3734398  | T                    | C                   | 0.4394                         | -0.0404     | 0.0029    | 9.61E-44       | 0.010784  | 96.63196 |
| rs12587311 | T                    | C                   | 0.5                            | -0.0142     | 0.0028    | 5.31E-07       | 0.00145   | 12.87547 |
| rs7435     | A                    | G                   | 0.3232                         | -0.0173     | 0.0033    | 2.40E-07       | 0.001356  | 12.03698 |
| rs174547   | T                    | C                   | 0.3586                         | 0.0746      | 0.0028    | 3.79E-154      | 0.03683   | 338.9456 |



**Table S8. 5 valid IVs used for MR analysis of n-6 Adrenic A on ADHD**

| <b>SNP</b> | <b>Effect allele</b> | <b>Other allele</b> | <b>Effect allele frequency</b> | <b>Beta</b> | <b>SE</b> | <b>P value</b> | <b>R2</b> | <b>F</b> |
|------------|----------------------|---------------------|--------------------------------|-------------|-----------|----------------|-----------|----------|
| rs174550   | T                    | C                   | 0.3586                         | 0.0484      | 0.0019    | 3.98E-140      | 0.034585  | 309.1279 |
| rs3134950  | A                    | C                   | 0.492                          | -0.0097     | 0.0021    | 5.72E-06       | 0.001204  | 10.39933 |
| rs721653   | T                    | C                   | 0.4495                         | 0.009       | 0.002     | 4.74E-06       | 0.001161  | 10.03104 |
| rs1962772  | T                    | C                   | 0.3485                         | 0.01        | 0.002     | 8.96E-07       | 0.001315  | 11.3647  |
| rs10761785 | T                    | G                   | 0.4899                         | 0.0107      | 0.0021    | 6.51E-07       | 0.001503  | 12.99195 |

**Table S9. 12 valid IVs used for MR analysis of n-6 DGLA on ADHD**

| <b>SNP</b> | <b>Effect allele</b> | <b>Other allele</b> | <b>Effect allele frequency</b> | <b>Beta</b> | <b>SE</b> | <b>P value</b> | <b>R2</b> | <b>F</b> |
|------------|----------------------|---------------------|--------------------------------|-------------|-----------|----------------|-----------|----------|
| rs10805631 | A                    | G                   | 0.0012                         | 1.1081      | 0.1305    | 2.04E-17       | 0.001215  | 10.5009  |
| rs174555   | T                    | C                   | 0.7101                         | -0.3891     | 0.0141    | 4.57E-168      | 0.001621  | 14.00676 |
| rs2493965  | T                    | C                   | 6.00E-04                       | 0.7588      | 0.1152    | 4.54E-11       | 0.002222  | 19.21514 |
| rs2906312  | A                    | C                   | 0.0131                         | 1.1924      | 0.1801    | 3.57E-11       | 0.001443  | 12.4714  |
| rs4761413  | A                    | G                   | 0.9995                         | -1.4325     | 0.1137    | 2.04E-36       | 0.00117   | 10.11137 |
| rs4985155  | A                    | G                   | 0.6477                         | 0.222       | 0.0128    | 1.56E-67       | 0.015606  | 136.7956 |
| rs540613   | T                    | C                   | 0.1782                         | -0.1222     | 0.0208    | 4.35E-09       | 0.037267  | 334.0283 |
| rs6083308  | T                    | G                   | 0.0175                         | 1.0582      | 0.0639    | 1.12E-61       | 0.002717  | 23.51171 |
| rs6085153  | T                    | G                   | 0.9864                         | -1.0157     | 0.1802    | 1.74E-08       | 0.003149  | 27.25925 |
| rs771009   | A                    | G                   | 0.0197                         | 1.0569      | 0.1425    | 1.20E-13       | 0.001184  | 10.22602 |
| rs825338   | A                    | G                   | 8.00E-04                       | -0.7058     | 0.0636    | 1.33E-28       | 0.00334   | 28.91556 |
| rs9514206  | T                    | G                   | 0.0109                         | 1.2127      | 0.195     | 4.99E-10       | 0.011835  | 103.3512 |

**Table S10. 48 valid IVs used for MR analysis of n-6 GLA on ADHD**

| <b>SNP</b> | <b>Effect allele</b> | <b>Other allele</b> | <b>Effect allele frequency</b> | <b>Beta</b> | <b>SE</b> | <b>P value</b> | <b>R2</b> | <b>F</b> |
|------------|----------------------|---------------------|--------------------------------|-------------|-----------|----------------|-----------|----------|
| rs13210378 | A                    | C                   | 0.0017                         | -0.0647     | 0.0086    | 7.11E-14       | 0.001686  | 14.57264 |
| rs11610576 | T                    | C                   | 0.0068                         | 0.1413      | 0.0132    | 1.45E-26       | 0.001273  | 11.00032 |
| rs11248254 | A                    | G                   | 0.0066                         | 0.1211      | 0.0142    | 1.85E-17       | 0.001181  | 10.19974 |
| rs7726400  | T                    | C                   | 0.006                          | 0.1549      | 0.0138    | 2.12E-29       | 0.006488  | 56.34644 |
| rs2669956  | A                    | G                   | 0.025                          | 0.1746      | 0.0273    | 1.66E-10       | 0.001499  | 12.95764 |
| rs259624   | A                    | G                   | 0.0236                         | 0.0445      | 0.0057    | 7.85E-15       | 0.003114  | 26.9588  |
| rs6589953  | A                    | G                   | 0.0136                         | 0.1347      | 0.0101    | 1.86E-40       | 0.00253   | 21.88637 |
| rs4497385  | T                    | G                   | 0.9881                         | -0.1345     | 0.0116    | 4.05E-31       | 0.003318  | 28.72725 |
| rs12904618 | A                    | G                   | 0.0138                         | 0.134       | 0.0105    | 3.05E-37       | 0.008117  | 70.61164 |
| rs2121853  | T                    | C                   | 0.0138                         | 0.1159      | 0.0107    | 4.16E-27       | 0.006796  | 59.04527 |
| rs2377006  | A                    | G                   | 0.0228                         | 0.1229      | 0.0081    | 1.34E-52       | 0.001822  | 15.74728 |
| rs7546429  | A                    | G                   | 0.9824                         | 0.0786      | 0.0044    | 4.77E-72       | 0.002173  | 18.78857 |
| rs17441050 | A                    | G                   | 0.0261                         | 0.1218      | 0.0071    | 1.59E-65       | 0.002004  | 17.3244  |
| rs17159989 | A                    | G                   | 0.9872                         | -0.1174     | 0.0087    | 8.70E-42       | 0.00124   | 10.71139 |
| rs4985155  | A                    | G                   | 0.6469                         | 0.0062      | 9.00E-04  | 1.97E-12       | 0.002462  | 21.29728 |
| rs4891073  | T                    | C                   | 0.9949                         | -0.161      | 0.0152    | 4.02E-26       | 0.003522  | 30.50134 |
| rs11542415 | T                    | C                   | 0.0206                         | 0.1234      | 0.0086    | 3.28E-47       | 0.001629  | 14.08061 |
| rs10127697 | A                    | G                   | 0.9947                         | -0.1683     | 0.0153    | 4.60E-28       | 0.002879  | 24.9188  |

|            |   |   |        |         |          |          |          |          |
|------------|---|---|--------|---------|----------|----------|----------|----------|
| rs4760416  | A | C | 0.0087 | 0.0967  | 0.0136   | 1.11E-12 | 0.001958 | 16.92651 |
| rs16843534 | A | G | 0.024  | 0.0453  | 0.003    | 2.68E-50 | 0.001303 | 11.25747 |
| rs661706   | A | G | 0.0036 | 0.1651  | 0.0148   | 5.97E-29 | 0.00659  | 57.24395 |
| rs7441263  | A | G | 0.0057 | 0.1547  | 0.0127   | 3.67E-34 | 0.002984 | 25.82498 |
| rs8085143  | T | C | 0.987  | -0.1417 | 0.0099   | 2.42E-46 | 0.003526 | 30.53191 |
| rs12635046 | T | C | 0.9937 | -0.1461 | 0.0146   | 1.94E-23 | 0.004075 | 35.31083 |
| rs10800248 | A | G | 0.9854 | -0.112  | 0.0104   | 4.19E-27 | 0.004491 | 38.92829 |
| rs6704119  | T | G | 0.0143 | 0.1051  | 0.011    | 1.76E-21 | 0.00528  | 45.80143 |
| rs6954039  | A | G | 0.0145 | 0.1353  | 0.0096   | 4.75E-45 | 0.009336 | 81.31592 |
| rs6763739  | A | G | 0.0073 | 0.0828  | 0.0146   | 1.45E-08 | 0.001754 | 15.15961 |
| rs8018207  | T | C | 0.0074 | 0.1491  | 0.0136   | 4.21E-28 | 0.00171  | 14.77752 |
| rs4639338  | T | C | 0.006  | 0.1547  | 0.0136   | 8.68E-30 | 0.001162 | 10.04174 |
| rs1506573  | A | C | 0.0179 | 0.0398  | 0.0061   | 7.21E-11 | 0.00153  | 13.22028 |
| rs4560444  | A | C | 0.0097 | 0.0812  | 0.0083   | 8.02E-23 | 0.004186 | 36.27267 |
| rs3936022  | T | C | 0.0201 | 0.1207  | 0.0084   | 3.18E-47 | 0.010104 | 88.07877 |
| rs12196577 | T | C | 0.0045 | 0.1702  | 0.0156   | 7.51E-28 | 0.002279 | 19.7136  |
| rs9264921  | T | C | 0.0048 | 0.1544  | 0.0128   | 1.90E-33 | 0.004795 | 41.57665 |
| rs174547   | T | C | 0.6744 | 0.0156  | 9.00E-04 | 2.29E-72 | 0.016013 | 140.4247 |
| rs5995311  | A | G | 0.9618 | -0.0669 | 0.0059   | 9.37E-30 | 0.001294 | 11.17962 |
| rs13126378 | A | C | 0.0189 | 0.055   | 0.0085   | 1.28E-10 | 0.001443 | 12.47089 |

|            |   |   |        |         |        |          |          |          |
|------------|---|---|--------|---------|--------|----------|----------|----------|
| rs12783205 | T | C | 0.9793 | -0.1074 | 0.0081 | 7.65E-40 | 0.001769 | 15.29411 |
| rs11849227 | A | C | 0.0056 | 0.1467  | 0.0148 | 3.05E-23 | 0.002512 | 21.73323 |
| rs6083308  | T | G | 0.017  | 0.0308  | 0.0047 | 3.64E-11 | 0.001853 | 16.02221 |
| rs4236845  | T | G | 0.0049 | 0.1564  | 0.0152 | 1.11E-24 | 0.006118 | 53.11379 |
| rs6062730  | T | C | 0.9937 | -0.1135 | 0.0154 | 1.76E-13 | 0.002437 | 21.08324 |
| rs12334645 | T | C | 0.9995 | -0.1837 | 0.0126 | 8.13E-48 | 0.001215 | 10.49363 |
| rs1148061  | T | C | 0.0059 | 0.1521  | 0.014  | 1.97E-27 | 0.004952 | 42.9403  |
| rs9347288  | T | G | 0.9925 | -0.0943 | 0.0162 | 5.62E-09 | 0.001218 | 10.51942 |
| rs10441549 | A | G | 0.0097 | 0.1122  | 0.0141 | 1.41E-15 | 0.001886 | 16.30652 |
| rs4924269  | A | G | 0.997  | -0.1595 | 0.0138 | 4.63E-31 | 0.0048   | 41.62195 |

---

**Table S11. 13 valid IVs used for MR analysis of ADHD on SFA, MUFA, n-3 DPA, n-3 EPA, n-6DGLA, n-6GLA**

| SNP        | Effect allele | Other allele | Effect allele frequency | Beta   | SE       | <i>P</i> value | R2       | F        |
|------------|---------------|--------------|-------------------------|--------|----------|----------------|----------|----------|
| rs4916723  | A             | C            | 0.4747                  | 0.011  | 9.48E-15 | -0.0853        | 0.000133 | 29.99076 |
| rs2582895  | C             | A            | 0.4091                  | 0.0096 | 4.09E-14 | 0.072497       | 0.000122 | 27.5756  |
| rs9969232  | G             | A            | 0.3485                  | 0.01   | 9.98E-12 | -0.0683        | 9.39E-05 | 21.18502 |
| rs6082363  | T             | C            | 0.2828                  | 0.0101 | 4.38E-12 | 0.0703         | 8.71E-05 | 19.65404 |
| rs704061   | T             | C            | 0.4091                  | 0.0094 | 2.30E-09 | -0.0559        | 7.58E-05 | 17.10138 |
| rs10875612 | C             | T            | 0.4798                  | 0.0093 | 5.62E-09 | -0.0543        | 7.54E-05 | 17.0172  |
| rs1162202  | C             | T            | 0.3586                  | 0.0102 | 1.92E-09 | 0.061396       | 7.39E-05 | 16.66781 |
| rs4925811  | T             | G            | 0.4343                  | 0.0101 | 8.30E-09 | -0.058         | 7.18E-05 | 16.20488 |
| rs17718444 | C             | T            | 0.3333                  | 0.0103 | 2.87E-09 | 0.061199       | 6.96E-05 | 15.69027 |
| rs7844069  | T             | G            | 0.3535                  | 0.0095 | 6.74E-09 | 0.055198       | 6.84E-05 | 15.43177 |
| rs7506904  | G             | A            | 0.3687                  | 0.0098 | 1.24E-08 | -0.0559        | 6.72E-05 | 15.14943 |
| rs11255890 | C             | A            | 0.298                   | 0.0097 | 4.14E-08 | 0.053          | 5.54E-05 | 12.49158 |
| rs1438898  | A             | C            | 0.2374                  | 0.0108 | 4.88E-09 | 0.0629         | 5.45E-05 | 12.28221 |

**Table S12. 12 valid IVs used for MR analysis of ADHD on n-3ALA**

| <b>SNP</b> | <b>Effect allele</b> | <b>Other allele</b> | <b>Effect allele frequency</b> | <b>Beta</b> | <b>SE</b> | <b>P value</b> | <b>R2</b> | <b>F</b> |
|------------|----------------------|---------------------|--------------------------------|-------------|-----------|----------------|-----------|----------|
| rs4916723  | A                    | C                   | 0.4747                         | 0.011       | 9.48E-15  | -0.0853        | 0.000133  | 29.99076 |
| rs9969232  | G                    | A                   | 0.3485                         | 0.01        | 9.98E-12  | -0.0683        | 9.39E-05  | 21.18502 |
| rs6082363  | T                    | C                   | 0.2828                         | 0.0101      | 4.38E-12  | 0.0703         | 8.71E-05  | 19.65404 |
| rs704061   | T                    | C                   | 0.4091                         | 0.0094      | 2.30E-09  | -0.0559        | 7.58E-05  | 17.10138 |
| rs10875612 | C                    | T                   | 0.4798                         | 0.0093      | 5.62E-09  | -0.0543        | 7.54E-05  | 17.0172  |
| rs1162202  | C                    | T                   | 0.3586                         | 0.0102      | 1.92E-09  | 0.061396       | 7.39E-05  | 16.66781 |
| rs4925811  | T                    | G                   | 0.4343                         | 0.0101      | 8.30E-09  | -0.058         | 7.18E-05  | 16.20488 |
| rs17718444 | C                    | T                   | 0.3333                         | 0.0103      | 2.87E-09  | 0.061199       | 6.96E-05  | 15.69027 |
| rs7844069  | T                    | G                   | 0.3535                         | 0.0095      | 6.74E-09  | 0.055198       | 6.84E-05  | 15.43177 |
| rs7506904  | G                    | A                   | 0.3687                         | 0.0098      | 1.24E-08  | -0.0559        | 6.72E-05  | 15.14943 |
| rs11255890 | C                    | A                   | 0.298                          | 0.0097      | 4.14E-08  | 0.053          | 5.54E-05  | 12.49158 |
| rs1438898  | A                    | C                   | 0.2374                         | 0.0108      | 4.88E-09  | 0.0629         | 5.45E-05  | 12.28221 |

**Table S13. 11 valid IVs used for MR analysis of ADHD on n-6 Adrenic acid**

| <b>SNP</b> | <b>Effect allele</b> | <b>Other allele</b> | <b>Effect allele frequency</b> | <b>Beta</b> | <b>SE</b> | <b>P value</b> | <b>R2</b> | <b>F</b> |
|------------|----------------------|---------------------|--------------------------------|-------------|-----------|----------------|-----------|----------|
| rs4916723  | A                    | C                   | 0.4747                         | 0.011       | 9.48E-15  | -0.0853        | 0.000133  | 29.99076 |
| rs6082363  | T                    | C                   | 0.2828                         | 0.0101      | 4.38E-12  | 0.0703         | 8.71E-05  | 19.65404 |
| rs704061   | T                    | C                   | 0.4091                         | 0.0094      | 2.30E-09  | -0.0559        | 7.58E-05  | 17.10138 |
| rs10875612 | C                    | T                   | 0.4798                         | 0.0093      | 5.62E-09  | -0.0543        | 7.54E-05  | 17.0172  |
| rs1162202  | C                    | T                   | 0.3586                         | 0.0102      | 1.92E-09  | 0.061396       | 7.39E-05  | 16.66781 |
| rs4925811  | T                    | G                   | 0.4343                         | 0.0101      | 8.30E-09  | -0.058         | 7.18E-05  | 16.20488 |
| rs17718444 | C                    | T                   | 0.3333                         | 0.0103      | 2.87E-09  | 0.061199       | 6.96E-05  | 15.69027 |
| rs7844069  | T                    | G                   | 0.3535                         | 0.0095      | 6.74E-09  | 0.055198       | 6.84E-05  | 15.43177 |
| rs7506904  | G                    | A                   | 0.3687                         | 0.0098      | 1.24E-08  | -0.0559        | 6.72E-05  | 15.14943 |
| rs1438898  | A                    | C                   | 0.2374                         | 0.0108      | 4.88E-09  | 0.0629         | 5.45E-05  | 12.28221 |
| rs2582895  | C                    | A                   | 0.4091                         | 0.0096      | 4.09E-14  | 0.072497       | 0.000122  | 27.5756  |
